# Supplementary material for: A diversity-generating retroelement encoded by a globally ubiquitous Bacteroides phage
Source: Microbiome. 2018 Oct 23;6:191. doi: 10.1186/s40168-018-0573-6 (PMC6199706; doi:10.1186/s40168-018-0573-6)
Supplement: Supplementary file 4 — Proportion of temperate and lytic viruses in the phage databases (RefSeq, PhagesDB, and DGR-containing prophage collection). Each phage life history was classified using PHACTS as ‘lytic’ or ‘temperate’ if the trees voting for that lifestyle is > 0.5. Otherwise, the phage lifestyle is listed as ‘N/A’. (XLSX 118 kb) [file 40168_2018_573_MOESM4_ESM.xlsx]

## Sheet: Sheet1
Phage	Lifestyle	PHACTS score
arthrobacter_phage_azathoth	lytic	0.504179
arthrobacter_phage_beatuscomedenti	lytic	0.502309
arthrobacter_phage_cgermain	lytic	0.502279
arthrobacter_phage_copper	lytic	0.507181
arthrobacter_phage_hunnie	lytic	0.5152
arthrobacter_phage_maggie	lytic	0.505092
arthrobacter_phage_mariposa	lytic	0.51051
arthrobacter_phage_tinocrisci	lytic	0.501178
arthrobacter_phage_yank	lytic	0.510809
camnt_0000000043	lytic	0.5217
camnt_0000000047	lytic	0.545563
camnt_0000000049	lytic	0.599037
camnt_0000000055	lytic	0.521871
camnt_0000000059	lytic	0.52734
camnt_0000000123	lytic	0.54396
camnt_0000000125	lytic	0.518716
camnt_0000000171	lytic	0.561573
camnt_0000000233	lytic	0.539908
camnt_0000000269	lytic	0.506274
camnt_0000000387	lytic	0.541161
camnt_0000000525	lytic	0.538071
camnt_0000000561	lytic	0.502338
camnt_0000000617	lytic	0.54509
camnt_0000000741	lytic	0.535505
camnt_0000000743	lytic	0.555927
camnt_0000000747	lytic	0.560705
camnt_0000000773	lytic	0.516102
mycobacterium_phage_arbiter_complete_sequence,	lytic	0.540877
mycobacterium_phage_ares	lytic	0.517817
mycobacterium_phage_boyle	lytic	0.522686
mycobacterium_phage_brownie5	lytic	0.500629
mycobacterium_phage_coffee	lytic	0.553217
mycobacterium_phage_corndog_complete_sequence,	lytic	0.533824
mycobacterium_phage_d29	lytic	0.542726
mycobacterium_phage_eaglehorse	lytic	0.514046
mycobacterium_phage_familton	lytic	0.531772
mycobacterium_phage_faze9	lytic	0.556738
mycobacterium_phage_firecracker_complete_sequence,	lytic	0.52349
mycobacterium_phage_frenchfry	lytic	0.573198
mycobacterium_phage_glass	lytic	0.518957
mycobacterium_phage_hedgerow	lytic	0.505692
mycobacterium_phage_holeinone	lytic	0.521343
mycobacterium_phage_itsybitsy1	lytic	0.50473
mycobacterium_phage_jangdynasty	lytic	0.51357
mycobacterium_phage_kheth	lytic	0.502792
mycobacterium_phage_laurie	lytic	0.513801
mycobacterium_phage_lizlemon	lytic	0.51161
mycobacterium_phage_opia	lytic	0.535613
mycobacterium_phage_pipefish	lytic	0.504729
mycobacterium_phage_rhinoforte	lytic	0.512858
mycobacterium_phage_rosebush	lytic	0.533977
mycobacterium_phage_sabella	lytic	0.525389
mycobacterium_phage_tinciduntsolum	lytic	0.501584
mycobacterium_phage_west99	lytic	0.531985
mycobacterium_phage_yungjamal	lytic	0.517876
mycobacterium_phage_zakhe101	lytic	0.548899
nc_000866.4	lytic	0.780223
nc_001271.1	lytic	0.768809
nc_001418.1	lytic	0.536671
nc_001420.2	lytic	0.504507
nc_001421.2	lytic	0.54089
nc_001604.1	lytic	0.738483
nc_001629.1	lytic	0.546331
nc_001706.1	lytic	0.536313
nc_001835.1	lytic	0.579698
nc_001900.1	lytic	0.554516
nc_001909.1	lytic	0.570834
nc_001956.1	lytic	0.504485
nc_002014.1	lytic	0.540548
nc_002519.1	lytic	0.507226
nc_002649.1	lytic	0.536248
nc_003298.1	lytic	0.732243
nc_003714.1	lytic	0.504331
nc_003907.2	lytic	0.583321
nc_004174.1	lytic	0.511858
nc_004175.1	lytic	0.50297
nc_004333.2	lytic	0.614324
nc_004665.1	lytic	0.619995
nc_004678.1	lytic	0.681837
nc_004679.1	lytic	0.642545
nc_004684.1	lytic	0.560854
nc_004685.1	lytic	0.523343
nc_004746.1	lytic	0.539336
nc_004777.1	lytic	0.689432
nc_004831.2	lytic	0.560621
nc_004902.1	lytic	0.532086
nc_004928.1	lytic	0.692356
nc_005045.1	lytic	0.550369
nc_005066.1	lytic	0.779207
nc_005083.2	lytic	0.625381
nc_005135.1	lytic	0.598422
nc_005260.1	lytic	0.667211
nc_005263.2	lytic	0.640263
nc_005282.1	lytic	0.517959
nc_005342.2	lytic	0.614627
nc_005833.1	lytic	0.512064
nc_005859.1	lytic	0.579395
nc_005880.2	lytic	0.575183
nc_005886.2	lytic	0.517166
nc_006294.1	lytic	0.518091
nc_006565.1	lytic	0.516131
nc_006820.1	lytic	0.622439
nc_006883.2	lytic	0.572953
nc_006884.2	lytic	0.563296
nc_006936.1	lytic	0.583825
nc_007021.1	lytic	0.532098
nc_007022.1	lytic	0.599305
nc_007023.1	lytic	0.618343
nc_007046.1	lytic	0.585671
nc_007066.1	lytic	0.585187
nc_007149.1	lytic	0.59145
nc_007456.1	lytic	0.629245
nc_007709.1	lytic	0.502238
nc_008204.1	lytic	0.533975
nc_008208.1	lytic	0.596183
nc_008296.2	lytic	0.540532
nc_008371.1	lytic	0.525639
nc_008515.1	lytic	0.781465
nc_008694.1	lytic	0.72348
nc_008720.1	lytic	0.511716
nc_009543.1	lytic	0.51392
nc_009604.1	lytic	0.62303
nc_009811.2	lytic	0.617426
nc_009821.1	lytic	0.764641
nc_009875.1	lytic	0.512324
nc_009935.1	lytic	0.527499
nc_010105.1	lytic	0.775246
nc_010325.1	lytic	0.582745
nc_010326.1	lytic	0.52513
nc_010807.1	lytic	0.763842
nc_011038.1	lytic	0.725083
nc_011040.1	lytic	0.674341
nc_011042.1	lytic	0.597013
nc_011043.1	lytic	0.671791
nc_011045.1	lytic	0.745207
nc_011085.3	lytic	0.582697
nc_011107.1	lytic	0.542032
nc_011201.1	lytic	0.562076
nc_011534.1	lytic	0.735211
nc_012418.1	lytic	0.611454
nc_012638.1	lytic	0.774589
nc_012696.1	lytic	0.571318
nc_012697.1	lytic	0.588885
nc_012740.1	lytic	0.755149
nc_012741.1	lytic	0.76448
nc_013085.1	lytic	0.542892
nc_013155.1	lytic	0.504961
nc_013647.1	lytic	0.63124
nc_013651.1	lytic	0.562253
nc_014036.1	lytic	0.607826
nc_014260.1	lytic	0.687111
nc_014467.1	lytic	0.606625
nc_014595.1	lytic	0.686045
nc_014635.1	lytic	0.598068
nc_014636.1	lytic	0.647026
nc_014660.1	lytic	0.617236
nc_014661.1	lytic	0.621342
nc_014662.1	lytic	0.663803
nc_014663.1	lytic	0.639366
nc_014792.1	lytic	0.693576
nc_015159.1	lytic	0.549976
nc_015208.1	lytic	0.575775
nc_015249.1	lytic	0.666583
nc_015250.1	lytic	0.612623
nc_015251.1	lytic	0.560266
nc_015264.1	lytic	0.558868
nc_015271.1	lytic	0.638094
nc_015279.1	lytic	0.510966
nc_015280.1	lytic	0.521934
nc_015281.1	lytic	0.53932
nc_015282.1	lytic	0.515454
nc_015283.1	lytic	0.538452
nc_015284.1	lytic	0.528096
nc_015285.1	lytic	0.536544
nc_015286.1	lytic	0.55321
nc_015287.1	lytic	0.535304
nc_015288.1	lytic	0.517412
nc_015289.1	lytic	0.513107
nc_015290.1	lytic	0.522002
nc_015457.1	lytic	0.760851
nc_015719.1	lytic	0.668812
nc_016073.1	lytic	0.503285
nc_016565.1	lytic	0.580163
nc_017865.1	lytic	0.52198
nc_018087.3	lytic	0.629639
nc_018842.1	lytic	0.509483
nc_018855.1	lytic	0.722331
nc_019398.1	lytic	0.604523
nc_019399.1	lytic	0.760627
nc_019416.1	lytic	0.632382
nc_019443.1	lytic	0.512903
nc_019444.1	lytic	0.510085
nc_019448.1	lytic	0.506593
nc_019500.1	lytic	0.68277
nc_019503.1	lytic	0.752176
nc_019505.1	lytic	0.817668
nc_019510.1	lytic	0.604473
nc_019538.1	lytic	0.604288
nc_019543.1	lytic	0.59601
nc_019909.1	lytic	0.654225
nc_019920.1	lytic	0.501818
nc_020080.1	lytic	0.632949
nc_020083.1	lytic	0.509118
nc_020416.1	lytic	0.703754
nc_020484.1	lytic	0.529245
nc_020486.1	lytic	0.529911
nc_020837.1	lytic	0.519088
nc_020845.1	lytic	0.535799
nc_020851.1	lytic	0.516175
nc_020855.1	lytic	0.507964
nc_020869.1	lytic	0.50206
nc_020871.1	lytic	0.530207
nc_020879.1	lytic	0.619794
nc_021062.1	lytic	0.548934
nc_021071.1	lytic	0.526848
nc_021072.1	lytic	0.544042
nc_021344.2	lytic	0.611224
nc_021529.2	lytic	0.633053
nc_021530.1	lytic	0.52344
nc_021536.1	lytic	0.527213
nc_021559.1	lytic	0.537403
nc_021781.2	lytic	0.570494
nc_021854.1	lytic	0.507976
nc_021855.1	lytic	0.510308
nc_021860.1	lytic	0.5222
nc_022057.1	lytic	0.515902
nc_022091.1	lytic	0.523519
nc_022744.1	lytic	0.682762
nc_022746.1	lytic	0.531829
nc_022761.1	lytic	0.506607
nc_023005.1	lytic	0.532684
nc_023009.1	lytic	0.529916
nc_023548.1	lytic	0.57791
nc_023550.1	lytic	0.543722
nc_023558.1	lytic	0.602644
nc_023561.1	lytic	0.688886
nc_023568.1	lytic	0.615386
nc_023573.1	lytic	0.528757
nc_023576.1	lytic	0.621719
nc_023583.1	lytic	0.528274
nc_023584.1	lytic	0.525956
nc_023587.1	lytic	0.509524
nc_023688.1	lytic	0.615216
nc_023712.1	lytic	0.500972
nc_023715.1	lytic	0.715882
nc_023736.1	lytic	0.525354
nc_024121.1	lytic	0.61722
nc_024124.2	lytic	0.732297
nc_024125.2	lytic	0.773086
nc_024359.1	lytic	0.597293
nc_024360.1	lytic	0.565736
nc_024362.1	lytic	0.589529
nc_024364.1	lytic	0.603314
nc_024379.1	lytic	0.58522
nc_024383.1	lytic	0.622307
nc_024787.1	lytic	0.628191
nc_024794.1	lytic	0.695148
nc_025414.1	lytic	0.602454
nc_025416.1	lytic	0.504241
nc_025417.1	lytic	0.541618
nc_025419.1	lytic	0.809542
nc_025422.1	lytic	0.522025
nc_025425.1	lytic	0.758061
nc_025426.1	lytic	0.504397
nc_025437.1	lytic	0.712985
nc_025440.1	lytic	0.579914
nc_025447.1	lytic	0.500048
nc_025448.1	lytic	0.803526
nc_025449.1	lytic	0.794382
nc_025451.1	lytic	0.713609
nc_025829.1	lytic	0.783337
nc_026582.1	lytic	0.516329
nc_026599.1	lytic	0.512657
nc_026602.1	lytic	0.536014
nc_026607.2	lytic	0.666175
nc_026923.1	lytic	0.536187
nc_026924.1	lytic	0.502255
nc_026926.1	lytic	0.537783
nc_026927.1	lytic	0.502248
nc_026928.1	lytic	0.535271
nc_027130.1	lytic	0.558888
nc_027132.1	lytic	0.527958
nc_027204.1	lytic	0.521442
nc_027292.1	lytic	0.558911
nc_027329.1	lytic	0.504436
nc_027331.1	lytic	0.663289
nc_027344.1	lytic	0.649835
nc_027349.1	lytic	0.74335
nc_027353.1	lytic	0.765567
nc_027369.1	lytic	0.51335
nc_027375.1	lytic	0.548319
nc_027387.1	lytic	0.670895
nc_027404.1	lytic	0.790595
nc_027979.1	lytic	0.815804
nc_027983.1	lytic	0.781626
nc_027991.1	lytic	0.515404
nc_028448.1	lytic	0.786787
nc_028655.1	lytic	0.655773
nc_028661.1	lytic	0.597329
nc_028663.1	lytic	0.502448
nc_028683.1	lytic	0.654018
nc_028686.1	lytic	0.653637
nc_028688.1	lytic	0.660988
nc_028702.1	lytic	0.535394
nc_028762.1	lytic	0.617766
nc_028772.1	lytic	0.604392
nc_028773.1	lytic	0.593592
nc_028780.1	lytic	0.799404
nc_028795.1	lytic	0.711497
nc_028800.1	lytic	0.67133
nc_028808.1	lytic	0.522232
nc_028820.1	lytic	0.669625
nc_028822.1	lytic	0.675933
nc_028829.1	lytic	0.615449
nc_028836.1	lytic	0.510176
nc_028847.1	lytic	0.711942
nc_028863.1	lytic	0.679022
nc_028880.1	lytic	0.73949
nc_028881.1	lytic	0.683779
nc_028894.1	lytic	0.698735
nc_028900.1	lytic	0.50183
nc_028919.1	lytic	0.520132
nc_028925.1	lytic	0.675016
nc_028927.1	lytic	0.75483
nc_028940.1	lytic	0.653341
nc_028945.1	lytic	0.5224
nc_028955.1	lytic	0.539246
nc_028957.1	lytic	0.656071
nc_028977.1	lytic	0.618948
nc_029000.1	lytic	0.595828
nc_029013.1	lytic	0.646681
g.1375.pp.2	lytic	0.501036
actinoplanes_phage_phiasp2	N/A	<0.5
arthrobacter_phage_abidatro	N/A	<0.5
arthrobacter_phage_adaia	N/A	<0.5
arthrobacter_phage_adat	N/A	<0.5
arthrobacter_phage_amigo	N/A	<0.5
arthrobacter_phage_anansi	N/A	<0.5
arthrobacter_phage_anjali	N/A	<0.5
arthrobacter_phage_arv1	N/A	<0.5
arthrobacter_phage_atraxa	N/A	<0.5
arthrobacter_phage_auxilium	N/A	<0.5
arthrobacter_phage_barretlemon	N/A	<0.5
arthrobacter_phage_beagle	N/A	<0.5
arthrobacter_phage_beans	N/A	<0.5
arthrobacter_phage_bennie,	N/A	<0.5
arthrobacter_phage_bigmack	N/A	<0.5
arthrobacter_phage_blair	N/A	<0.5
arthrobacter_phage_boersma	N/A	<0.5
arthrobacter_phage_bosslady	N/A	<0.5
arthrobacter_phage_brad	N/A	<0.5
arthrobacter_phage_brent	N/A	<0.5
arthrobacter_phage_breylor17	N/A	<0.5
arthrobacter_phage_bridgette	N/A	<0.5
arthrobacter_phage_callieomalley	N/A	<0.5
arthrobacter_phage_canowicakte	N/A	<0.5
arthrobacter_phage_capnmurica	N/A	<0.5
arthrobacter_phage_caterpillar	N/A	<0.5
arthrobacter_phage_cheesy	N/A	<0.5
arthrobacter_phage_chestnut	N/A	<0.5
arthrobacter_phage_chipper1996	N/A	<0.5
arthrobacter_phage_chocolat	N/A	<0.5
arthrobacter_phage_cholula	N/A	<0.5
arthrobacter_phage_christian	N/A	<0.5
arthrobacter_phage_chubster	N/A	<0.5
arthrobacter_phage_circum	N/A	<0.5
arthrobacter_phage_colucci	N/A	<0.5
arthrobacter_phage_conboy	N/A	<0.5
arthrobacter_phage_constance	N/A	<0.5
arthrobacter_phage_corgi	N/A	<0.5
arthrobacter_phage_courtney3	N/A	<0.5
arthrobacter_phage_daiboju	N/A	<0.5
arthrobacter_phage_daob	N/A	<0.5
arthrobacter_phage_decurro	N/A	<0.5
arthrobacter_phage_dewayne	N/A	<0.5
arthrobacter_phage_dino	N/A	<0.5
arthrobacter_phage_drmanhattan	N/A	<0.5
arthrobacter_phage_drrobert	N/A	<0.5
arthrobacter_phage_dryang	N/A	<0.5
arthrobacter_phage_edgarpoe	N/A	<0.5
arthrobacter_phage_edmundo	N/A	<0.5
arthrobacter_phage_egad	N/A	<0.5
arthrobacter_phage_eileen	N/A	<0.5
arthrobacter_phage_elephantman	N/A	<0.5
arthrobacter_phage_elesar	N/A	<0.5
arthrobacter_phage_elkhorn	N/A	<0.5
arthrobacter_phage_elsa	N/A	<0.5
arthrobacter_phage_fluke	N/A	<0.5
arthrobacter_phage_franzy	N/A	<0.5
arthrobacter_phage_glenn	N/A	<0.5
arthrobacter_phage_gordon	N/A	<0.5
arthrobacter_phage_gorgeous	N/A	<0.5
arthrobacter_phage_greenhearts	N/A	<0.5
arthrobacter_phage_greenhouse	N/A	<0.5
arthrobacter_phage_guntur	N/A	<0.5
arthrobacter_phage_gurgleferb	N/A	<0.5
arthrobacter_phage_heisenberger	N/A	<0.5
arthrobacter_phage_herb	N/A	<0.5
arthrobacter_phage_huckleberry	N/A	<0.5
arthrobacter_phage_humptydumpty	N/A	<0.5
arthrobacter_phage_hunterdalle	N/A	<0.5
arthrobacter_phage_huntingdon	N/A	<0.5
arthrobacter_phage_ichor	N/A	<0.5
arthrobacter_phage_immaculata	N/A	<0.5
arthrobacter_phage_ingrid	N/A	<0.5
arthrobacter_phage_inspire2	N/A	<0.5
arthrobacter_phage_jaek	N/A	<0.5
arthrobacter_phage_jasmine	N/A	<0.5
arthrobacter_phage_jawnski	N/A	<0.5
arthrobacter_phage_jaycookie	N/A	<0.5
arthrobacter_phage_jeggs	N/A	<0.5
arthrobacter_phage_jessica	N/A	<0.5
arthrobacter_phage_joann	N/A	<0.5
arthrobacter_phage_judy	N/A	<0.5
arthrobacter_phage_kabreeze	N/A	<0.5
arthrobacter_phage_kburroustx	N/A	<0.5
arthrobacter_phage_keaneylin	N/A	<0.5
arthrobacter_phage_kellezio	N/A	<0.5
arthrobacter_phage_kepler	N/A	<0.5
arthrobacter_phage_kingbob	N/A	<0.5
arthrobacter_phage_kitkat	N/A	<0.5
arthrobacter_phage_korra_compelte_sequence,	N/A	<0.5
arthrobacter_phage_kyliemac	N/A	<0.5
arthrobacter_phage_laila	N/A	<0.5
arthrobacter_phage_laroye	N/A	<0.5
arthrobacter_phage_leeroyj	N/A	<0.5
arthrobacter_phage_lennox	N/A	<0.5
arthrobacter_phage_liebe	N/A	<0.5
arthrobacter_phage_link	N/A	<0.5
arthrobacter_phage_litotes	N/A	<0.5
arthrobacter_phage_lore	N/A	<0.5
arthrobacter_phage_loretta	N/A	<0.5
arthrobacter_phage_lucy	N/A	<0.5
arthrobacter_phage_lymara	N/A	<0.5
arthrobacter_phage_maja	N/A	<0.5
arthrobacter_phage_margaretkali	N/A	<0.5
arthrobacter_phage_martha	N/A	<0.5
arthrobacter_phage_massimo	N/A	<0.5
arthrobacter_phage_maureen	N/A	<0.5
arthrobacter_phage_mediumfry	N/A	<0.5
arthrobacter_phage_mendel	N/A	<0.5
arthrobacter_phage_michelle	N/A	<0.5
arthrobacter_phage_mimi	N/A	<0.5
arthrobacter_phage_moki	N/A	<0.5
arthrobacter_phage_molivia	N/A	<0.5
arthrobacter_phage_moloch	N/A	<0.5
arthrobacter_phage_mudcat	N/A	<0.5
arthrobacter_phage_mufasa8	N/A	<0.5
arthrobacter_phage_muttlie	N/A	<0.5
arthrobacter_phage_nandita	N/A	<0.5
arthrobacter_phage_nason	N/A	<0.5
arthrobacter_phage_nellie	N/A	<0.5
arthrobacter_phage_nightmare	N/A	<0.5
arthrobacter_phage_niktson	N/A	<0.5
arthrobacter_phage_noely	N/A	<0.5
arthrobacter_phage_nubia	N/A	<0.5
arthrobacter_phage_omalley	N/A	<0.5
arthrobacter_phage_ourgirlnessie	N/A	<0.5
arthrobacter_phage_oxynfrius	N/A	<0.5
arthrobacter_phage_piccoletto	N/A	<0.5
arthrobacter_phage_pitadog	N/A	<0.5
arthrobacter_phage_polka	N/A	<0.5
arthrobacter_phage_princesstrina	N/A	<0.5
arthrobacter_phage_prospero	N/A	<0.5
arthrobacter_phage_pumancara	N/A	<0.5
arthrobacter_phage_rap15	N/A	<0.5
arthrobacter_phage_rcigastruga	N/A	<0.5
arthrobacter_phage_richie	N/A	<0.5
arthrobacter_phage_rings	N/A	<0.5
arthrobacter_phage_ronnie	N/A	<0.5
arthrobacter_phage_rosieposie	N/A	<0.5
arthrobacter_phage_rozby	N/A	<0.5
arthrobacter_phage_salk	N/A	<0.5
arthrobacter_phage_sandman	N/A	<0.5
arthrobacter_phage_saphira	N/A	<0.5
arthrobacter_phage_scavito	N/A	<0.5
arthrobacter_phage_seahorse	N/A	<0.5
arthrobacter_phage_sergei	N/A	<0.5
arthrobacter_phage_seume	N/A	<0.5
arthrobacter_phage_shade	N/A	<0.5
arthrobacter_phage_shepard	N/A	<0.5
arthrobacter_phage_shiba	N/A	<0.5
arthrobacter_phage_shrooms	N/A	<0.5
arthrobacter_phage_sonny	N/A	<0.5
arthrobacter_phage_sorjuana	N/A	<0.5
arthrobacter_phage_sporto	N/A	<0.5
arthrobacter_phage_sputnik	N/A	<0.5
arthrobacter_phage_starlord	N/A	<0.5
arthrobacter_phage_stayer	N/A	<0.5
arthrobacter_phage_steviebay	N/A	<0.5
arthrobacter_phage_stewiegriff	N/A	<0.5
arthrobacter_phage_stratus	N/A	<0.5
arthrobacter_phage_supakev	N/A	<0.5
arthrobacter_phage_suppi	N/A	<0.5
arthrobacter_phage_swenson	N/A	<0.5
arthrobacter_phage_synepsis	N/A	<0.5
arthrobacter_phage_taeyoung	N/A	<0.5
arthrobacter_phage_taj14	N/A	<0.5
arthrobacter_phage_tank	N/A	<0.5
arthrobacter_phage_tattmodd	N/A	<0.5
arthrobacter_phage_teacup	N/A	<0.5
arthrobacter_phage_temper16	N/A	<0.5
arthrobacter_phage_timinator	N/A	<0.5
arthrobacter_phage_tophat	N/A	<0.5
arthrobacter_phage_toulouse	N/A	<0.5
arthrobacter_phage_tribby	N/A	<0.5
arthrobacter_phage_triplej	N/A	<0.5
arthrobacter_phage_tymabreu	N/A	<0.5
arthrobacter_phage_urla	N/A	<0.5
arthrobacter_phage_vallejo	N/A	<0.5
arthrobacter_phage_vulture	N/A	<0.5
arthrobacter_phage_waltz	N/A	<0.5
arthrobacter_phage_wayne,	N/A	<0.5
arthrobacter_phage_wilde	N/A	<0.5
arthrobacter_phage_yang	N/A	<0.5
arthrobacter_phage_yeezus	N/A	<0.5
arthrobacter_phage_zartrosa	N/A	<0.5
arthrobacter_phage_zorro	N/A	<0.5
belenaria	N/A	<0.5
brevibacterium_phage_cantare	N/A	<0.5
brevibacterium_phage_luckybarnes	N/A	<0.5
camnt_0000000081	N/A	<0.5
camnt_0000000083	N/A	<0.5
camnt_0000000087	N/A	<0.5
camnt_0000000093	N/A	<0.5
camnt_0000000095	N/A	<0.5
camnt_0000000107	N/A	<0.5
camnt_0000000109	N/A	<0.5
camnt_0000000111	N/A	<0.5
camnt_0000000135	N/A	<0.5
camnt_0000000139	N/A	<0.5
camnt_0000000141	N/A	<0.5
camnt_0000000189	N/A	<0.5
camnt_0000000215	N/A	<0.5
camnt_0000000235	N/A	<0.5
camnt_0000000301	N/A	<0.5
camnt_0000000315	N/A	<0.5
camnt_0000000319	N/A	<0.5
camnt_0000000339	N/A	<0.5
camnt_0000000345	N/A	<0.5
camnt_0000000359	N/A	<0.5
camnt_0000000397	N/A	<0.5
camnt_0000000417	N/A	<0.5
camnt_0000000433	N/A	<0.5
camnt_0000000571	N/A	<0.5
camnt_0000000577	N/A	<0.5
camnt_0000000611	N/A	<0.5
camnt_0000000615	N/A	<0.5
camnt_0000000621	N/A	<0.5
camnt_0000000639	N/A	<0.5
camnt_0000000749	N/A	<0.5
chewyviii	N/A	<0.5
corynebacterium_phage_c3po	N/A	<0.5
corynebacterium_phage_cruella	N/A	<0.5
corynebacterium_phage_darwin	N/A	<0.5
corynebacterium_phage_emirose	N/A	<0.5
corynebacterium_phage_kimchi1738	N/A	<0.5
corynebacterium_phage_peteypab	N/A	<0.5
corynebacterium_phage_potatochip	N/A	<0.5
corynebacterium_phage_zion	N/A	<0.5
gordonia_phage_adgers	N/A	<0.5
gordonia_phage_affeca	N/A	<0.5
gordonia_phage_agatha	N/A	<0.5
gordonia_phage_ailee	N/A	<0.5
gordonia_phage_alainamarie	N/A	<0.5
gordonia_phage_ali17	N/A	<0.5
gordonia_phage_anamika	N/A	<0.5
gordonia_phage_angelicage	N/A	<0.5
gordonia_phage_angelique	N/A	<0.5
gordonia_phage_anon	N/A	<0.5
gordonia_phage_aphelion	N/A	<0.5
gordonia_phage_arri	N/A	<0.5
gordonia_phage_asapag	N/A	<0.5
gordonia_phage_aserprocky	N/A	<0.5
gordonia_phage_ashertheman	N/A	<0.5
gordonia_phage_attis	N/A	<0.5
gordonia_phage_banquo	N/A	<0.5
gordonia_phage_barb	N/A	<0.5
gordonia_phage_batstarr	N/A	<0.5
gordonia_phage_baxterfox	N/A	<0.5
gordonia_phage_beenie	N/A	<0.5
gordonia_phage_begonia	N/A	<0.5
gordonia_phage_benczkowski14,	N/A	<0.5
gordonia_phage_bentherdunthat	N/A	<0.5
gordonia_phage_beyoncage	N/A	<0.5
gordonia_phage_bialota	N/A	<0.5
gordonia_phage_bibwit	N/A	<0.5
gordonia_phage_bipauneto	N/A	<0.5
gordonia_phage_birksandsocks	N/A	<0.5
gordonia_phage_bizzy	N/A	<0.5
gordonia_phage_blueberry	N/A	<0.5
gordonia_phage_bock	N/A	<0.5
gordonia_phage_boneham	N/A	<0.5
gordonia_phage_bowser	N/A	<0.5
gordonia_phage_brandonk123	N/A	<0.5
gordonia_phage_britbrat	N/A	<0.5
gordonia_phage_brylie	N/A	<0.5
gordonia_phage_buggaboo	N/A	<0.5
gordonia_phage_butterball	N/A	<0.5
gordonia_phage_carolann	N/A	<0.5
gordonia_phage_chidiebere	N/A	<0.5
gordonia_phage_coeur	N/A	<0.5
gordonia_phage_cozz	N/A	<0.5
gordonia_phage_cynthia	N/A	<0.5
gordonia_phage_danyall	N/A	<0.5
gordonia_phage_datboi	N/A	<0.5
gordonia_phage_delian	N/A	<0.5
gordonia_phage_delrio	N/A	<0.5
gordonia_phage_demosthenes	N/A	<0.5
gordonia_phage_denise	N/A	<0.5
gordonia_phage_dexdert	N/A	<0.5
gordonia_phage_dinodaryn	N/A	<0.5
gordonia_phage_djokovic	N/A	<0.5
gordonia_phage_dmitri	N/A	<0.5
gordonia_phage_ebert	N/A	<0.5
gordonia_phage_emalyn,	N/A	<0.5
gordonia_phage_emianna	N/A	<0.5
gordonia_phage_emoore	N/A	<0.5
gordonia_phage_emperor	N/A	<0.5
gordonia_phage_evamon	N/A	<0.5
gordonia_phage_exiguo	N/A	<0.5
gordonia_phage_eyes	N/A	<0.5
gordonia_phage_eyre	N/A	<0.5
gordonia_phage_fairfaxidum	N/A	<0.5
gordonia_phage_felixalejandro	N/A	<0.5
gordonia_phage_fenry	N/A	<0.5
gordonia_phage_flakey	N/A	<0.5
gordonia_phage_flapper	N/A	<0.5
gordonia_phage_forza	N/A	<0.5
gordonia_phage_fosterous	N/A	<0.5
gordonia_phage_fryberger	N/A	<0.5
gordonia_phage_fugax	N/A	<0.5
gordonia_phage_fury	N/A	<0.5
gordonia_phage_gambino	N/A	<0.5
gordonia_phage_geazy	N/A	<0.5
gordonia_phage_geodirt	N/A	<0.5
gordonia_phage_getalong	N/A	<0.5
gordonia_phage_ghobes	N/A	<0.5
gordonia_phage_gma1	N/A	<0.5
gordonia_phage_gma2	N/A	<0.5
gordonia_phage_gma3	N/A	<0.5
gordonia_phage_gma4	N/A	<0.5
gordonia_phage_gma5	N/A	<0.5
gordonia_phage_gma6	N/A	<0.5
gordonia_phage_gma7	N/A	<0.5
gordonia_phage_godonk	N/A	<0.5
gordonia_phage_gorko	N/A	<0.5
gordonia_phage_gravy	N/A	<0.5
gordonia_phage_gru1	N/A	<0.5
gordonia_phage_gru3	N/A	<0.5
gordonia_phage_gsput1	N/A	<0.5
gordonia_phage_gte2	N/A	<0.5
gordonia_phage_gte5	N/A	<0.5
gordonia_phage_gte6	N/A	<0.5
gordonia_phage_gte7	N/A	<0.5
gordonia_phage_gte8	N/A	<0.5
gordonia_phage_gudmit	N/A	<0.5
gordonia_phage_guillaume	N/A	<0.5
gordonia_phage_gustav	N/A	<0.5
gordonia_phage_hail2pitt	N/A	<0.5
gordonia_phage_harambe	N/A	<0.5
gordonia_phage_hedwig	N/A	<0.5
gordonia_phage_huffy	N/A	<0.5
gordonia_phage_idyn	N/A	<0.5
gordonia_phage_jeanie	N/A	<0.5
gordonia_phage_jifall16	N/A	<0.5
gordonia_phage_jormungandr	N/A	<0.5
gordonia_phage_jswag	N/A	<0.5
gordonia_phage_juju	N/A	<0.5
gordonia_phage_jumbo	N/A	<0.5
gordonia_phage_kabluna	N/A	<0.5
gordonia_phage_katherineg	N/A	<0.5
gordonia_phage_katyusha,	N/A	<0.5
gordonia_phage_kerry	N/A	<0.5
gordonia_phage_kiko	N/A	<0.5
gordonia_phage_kimmyk	N/A	<0.5
gordonia_phage_kurt	N/A	<0.5
gordonia_phage_kvothe	N/A	<0.5
gordonia_phage_lahirium	N/A	<0.5
gordonia_phage_lennon	N/A	<0.5
gordonia_phage_leonard	N/A	<0.5
gordonia_phage_lilas	N/A	<0.5
gordonia_phage_lordfarquaad	N/A	<0.5
gordonia_phage_lozinak	N/A	<0.5
gordonia_phage_lucky10	N/A	<0.5
gordonia_phage_lutum	N/A	<0.5
gordonia_phage_lysidious	N/A	<0.5
gordonia_phage_mahdia	N/A	<0.5
gordonia_phage_margaret	N/A	<0.5
gordonia_phage_mcgonagall	N/A	<0.5
gordonia_phage_mellie	N/A	<0.5
gordonia_phage_mollymur	N/A	<0.5
gordonia_phage_monty	N/A	<0.5
gordonia_phage_morrissey	N/A	<0.5
gordonia_phage_msay19	N/A	<0.5
gordonia_phage_mulch	N/A	<0.5
gordonia_phage_mutzi	N/A	<0.5
gordonia_phage_nadeem	N/A	<0.5
gordonia_phage_natb6	N/A	<0.5
gordonia_phage_neoevie	N/A	<0.5
gordonia_phage_nimi13	N/A	<0.5
gordonia_phage_nina	N/A	<0.5
gordonia_phage_nordenberg	N/A	<0.5
gordonia_phage_nosilam	N/A	<0.5
gordonia_phage_nyceirae	N/A	<0.5
gordonia_phage_odesza	N/A	<0.5
gordonia_phage_orchid	N/A	<0.5
gordonia_phage_parada	N/A	<0.5
gordonia_phage_patio	N/A	<0.5
gordonia_phage_patrickstar	N/A	<0.5
gordonia_phage_petra	N/A	<0.5
gordonia_phage_phendrix	N/A	<0.5
gordonia_phage_phinally	N/A	<0.5
gordonia_phage_phistory	N/A	<0.5
gordonia_phage_pleakley	N/A	<0.5
gordonia_phage_portcullis	N/A	<0.5
gordonia_phage_pupper	N/A	<0.5
gordonia_phage_quasar	N/A	<0.5
gordonia_phage_remus	N/A	<0.5
gordonia_phage_reyja	N/A	<0.5
gordonia_phage_ribeye	N/A	<0.5
gordonia_phage_robinsparkles	N/A	<0.5
gordonia_phage_rofo	N/A	<0.5
gordonia_phage_rosalind	N/A	<0.5
gordonia_phage_ruthy	N/A	<0.5
gordonia_phage_sallyspecial	N/A	<0.5
gordonia_phage_samba	N/A	<0.5
gordonia_phage_savage	N/A	<0.5
gordonia_phage_scentae	N/A	<0.5
gordonia_phage_schiebs	N/A	<0.5
gordonia_phage_schwabeltier	N/A	<0.5
gordonia_phage_shayra	N/A	<0.5
gordonia_phage_sketchmex	N/A	<0.5
gordonia_phage_skog	N/A	<0.5
gordonia_phage_smokingbunny	N/A	<0.5
gordonia_phage_soilassassin	N/A	<0.5
gordonia_phage_soups	N/A	<0.5
gordonia_phage_sour	N/A	<0.5
gordonia_phage_splinter	N/A	<0.5
gordonia_phage_sproutie	N/A	<0.5
gordonia_phage_stevefrench	N/A	<0.5
gordonia_phage_strosahl	N/A	<0.5
gordonia_phage_stultus	N/A	<0.5
gordonia_phage_supersulley	N/A	<0.5
gordonia_phage_tangent	N/A	<0.5
gordonia_phage_tangerine	N/A	<0.5
gordonia_phage_teatealatte	N/A	<0.5
gordonia_phage_terapin	N/A	<0.5
gordonia_phage_tiamoceli	N/A	<0.5
gordonia_phage_toast	N/A	<0.5
gordonia_phage_toniann	N/A	<0.5
gordonia_phage_tredge	N/A	<0.5
gordonia_phage_trine	N/A	<0.5
gordonia_phage_troje	N/A	<0.5
gordonia_phage_turuncu	N/A	<0.5
gordonia_phage_twister6	N/A	<0.5
gordonia_phage_umathurman	N/A	<0.5
gordonia_phage_utz	N/A	<0.5
gordonia_phage_valary	N/A	<0.5
gordonia_phage_vandewege	N/A	<0.5
gordonia_phage_vendetta	N/A	<0.5
gordonia_phage_vivi2	N/A	<0.5
gordonia_phage_volt	N/A	<0.5
gordonia_phage_waits	N/A	<0.5
gordonia_phage_welcomeayanna	N/A	<0.5
gordonia_phage_wheatthin	N/A	<0.5
gordonia_phage_william	N/A	<0.5
gordonia_phage_wizard	N/A	<0.5
gordonia_phage_woes	N/A	<0.5
gordonia_phage_yago84	N/A	<0.5
gordonia_phage_yeezy	N/A	<0.5
microbacterium_phage_adler	N/A	<0.5
microbacterium_phage_annaserena	N/A	<0.5
microbacterium_phage_antoinette	N/A	<0.5
microbacterium_phage_appa	N/A	<0.5
microbacterium_phage_aubergine	N/A	<0.5
microbacterium_phage_axipup	N/A	<0.5
microbacterium_phage_baines	N/A	<0.5
microbacterium_phage_balsa	N/A	<0.5
microbacterium_phage_bandik	N/A	<0.5
microbacterium_phage_beebee8	N/A	<0.5
microbacterium_phage_bonaevitae	N/A	<0.5
microbacterium_phage_bonino	N/A	<0.5
microbacterium_phage_burtonthepup	N/A	<0.5
microbacterium_phage_casey	N/A	<0.5
microbacterium_phage_convict	N/A	<0.5
microbacterium_phage_count	N/A	<0.5
microbacterium_phage_dave	N/A	<0.5
microbacterium_phage_didgeridoo	N/A	<0.5
microbacterium_phage_dismas	N/A	<0.5
microbacterium_phage_dongwon	N/A	<0.5
microbacterium_phage_elva	N/A	<0.5
microbacterium_phage_etna	N/A	<0.5
microbacterium_phage_floof	N/A	<0.5
microbacterium_phage_gargoyle	N/A	<0.5
microbacterium_phage_gelo	N/A	<0.5
microbacterium_phage_gilda	N/A	<0.5
microbacterium_phage_golden	N/A	<0.5
microbacterium_phage_hamlet	N/A	<0.5
microbacterium_phage_hortus1	N/A	<0.5
microbacterium_phage_hyperion	N/A	<0.5
microbacterium_phage_ilzat	N/A	<0.5
microbacterium_phage_kale	N/A	<0.5
microbacterium_phage_kieran	N/A	<0.5
microbacterium_phage_knox	N/A	<0.5
microbacterium_phage_koji	N/A	<0.5
microbacterium_phage_krampus	N/A	<0.5
microbacterium_phage_lucky3	N/A	<0.5
microbacterium_phage_ludgate	N/A	<0.5
microbacterium_phage_mellow	N/A	<0.5
microbacterium_phage_mementomori	N/A	<0.5
microbacterium_phage_metamorphoo	N/A	<0.5
microbacterium_phage_miaurora	N/A	<0.5
microbacterium_phage_minima	N/A	<0.5
microbacterium_phage_musetta	N/A	<0.5
microbacterium_phage_nagem	N/A	<0.5
microbacterium_phage_nattles	N/A	<0.5
microbacterium_phage_noelani	N/A	<0.5
microbacterium_phage_olindd	N/A	<0.5
microbacterium_phage_pajaza	N/A	<0.5
microbacterium_phage_paopu	N/A	<0.5
microbacterium_phage_peep	N/A	<0.5
microbacterium_phage_peppino	N/A	<0.5
microbacterium_phage_percival	N/A	<0.5
microbacterium_phage_pioneer3	N/A	<0.5
microbacterium_phage_puppyeggo	N/A	<0.5
microbacterium_phage_quhwah	N/A	<0.5
microbacterium_phage_raccoon	N/A	<0.5
microbacterium_phage_raptor	N/A	<0.5
microbacterium_phage_redfield	N/A	<0.5
microbacterium_phage_robinson	N/A	<0.5
microbacterium_phage_robsfeet	N/A	<0.5
microbacterium_phage_squash	N/A	<0.5
microbacterium_phage_superfresh	N/A	<0.5
microbacterium_phage_tandem	N/A	<0.5
microbacterium_phage_teddybear	N/A	<0.5
microbacterium_phage_tenda	N/A	<0.5
microbacterium_phage_triscuit	N/A	<0.5
mycobacteriophage_ading	N/A	<0.5
mycobacteriophage_iridoclysis	N/A	<0.5
mycobacteriophage_nidhogg	N/A	<0.5
mycobacterium_phage_20es	N/A	<0.5
mycobacterium_phage_39hc	N/A	<0.5
mycobacterium_phage_40ac_nearly	N/A	<0.5
mycobacterium_phage_40bc	N/A	<0.5
mycobacterium_phage_abbypaige	N/A	<0.5
mycobacterium_phage_abbysranger	N/A	<0.5
mycobacterium_phage_abrogate_complete_sequence,	N/A	<0.5
mycobacterium_phage_abu	N/A	<0.5
mycobacterium_phage_acadian	N/A	<0.5
mycobacterium_phage_achebe	N/A	<0.5
mycobacterium_phage_acquire49	N/A	<0.5
mycobacterium_phage_actinup	N/A	<0.5
mycobacterium_phage_adahisdi	N/A	<0.5
mycobacterium_phage_adjutor	N/A	<0.5
mycobacterium_phage_adlitam	N/A	<0.5
mycobacterium_phage_adonis	N/A	<0.5
mycobacterium_phage_adzzy	N/A	<0.5
mycobacterium_phage_agentm	N/A	<0.5
mycobacterium_phage_agronagt15	N/A	<0.5
mycobacterium_phage_airmid_complete_sequence,	N/A	<0.5
mycobacterium_phage_akoma_complete_sequence,	N/A	<0.5
mycobacterium_phage_alangrant	N/A	<0.5
mycobacterium_phage_albee	N/A	<0.5
mycobacterium_phage_alice_complete_sequence,	N/A	<0.5
mycobacterium_phage_alishaph	N/A	<0.5
mycobacterium_phage_aliter	N/A	<0.5
mycobacterium_phage_alleycat	N/A	<0.5
mycobacterium_phage_alma_complete_sequence,	N/A	<0.5
mycobacterium_phage_alsfro	N/A	<0.5
mycobacterium_phage_altphacts	N/A	<0.5
mycobacterium_phage_altwerkus	N/A	<0.5
mycobacterium_phage_amataga	N/A	<0.5
mycobacterium_phage_amelie	N/A	<0.5
mycobacterium_phage_amohnition	N/A	<0.5
mycobacterium_phage_anaya_complete_sequence,	N/A	<0.5
mycobacterium_phage_andies	N/A	<0.5
mycobacterium_phage_angel	N/A	<0.5
mycobacterium_phage_angelica	N/A	<0.5
mycobacterium_phage_anglerfish_complete_sequence,	N/A	<0.5
mycobacterium_phage_annal29	N/A	<0.5
mycobacterium_phage_annihilator	N/A	<0.5
mycobacterium_phage_annyong	N/A	<0.5
mycobacterium_phage_anselm	N/A	<0.5
mycobacterium_phage_anubis	N/A	<0.5
mycobacterium_phage_apizium	N/A	<0.5
mycobacterium_phage_apocalypse	N/A	<0.5
mycobacterium_phage_aragog	N/A	<0.5
mycobacterium_phage_arcanine_complete_sequence,	N/A	<0.5
mycobacterium_phage_archernm	N/A	<0.5
mycobacterium_phage_archers7_complete_sequence,	N/A	<0.5
mycobacterium_phage_archetta	N/A	<0.5
mycobacterium_phage_arlo	N/A	<0.5
mycobacterium_phage_aroostook	N/A	<0.5
mycobacterium_phage_arturo_complete_sequence,	N/A	<0.5
mycobacterium_phage_ashraf	N/A	<0.5
mycobacterium_phage_astraea_complete_sequence,	N/A	<0.5
mycobacterium_phage_astro_complete_sequence,	N/A	<0.5
mycobacterium_phage_athena_complete_sequence,	N/A	<0.5
mycobacterium_phage_atiba	N/A	<0.5
mycobacterium_phage_atkinbua	N/A	<0.5
mycobacterium_phage_atlantean	N/A	<0.5
mycobacterium_phage_audrey	N/A	<0.5
mycobacterium_phage_audrick	N/A	<0.5
mycobacterium_phage_ava3	N/A	<0.5
mycobacterium_phage_avatarahpeg	N/A	<0.5
mycobacterium_phage_avrafan_complete_sequence,	N/A	<0.5
mycobacterium_phage_baberuth	N/A	<0.5
mycobacterium_phage_babsiella	N/A	<0.5
mycobacterium_phage_baby16	N/A	<0.5
mycobacterium_phage_bachome	N/A	<0.5
mycobacterium_phage_backyardigan	N/A	<0.5
mycobacterium_phage_bactobuster	N/A	<0.5
mycobacterium_phage_badagartude	N/A	<0.5
mycobacterium_phage_badfish	N/A	<0.5
mycobacterium_phage_badger	N/A	<0.5
mycobacterium_phage_baee	N/A	<0.5
mycobacterium_phage_baka	N/A	<0.5
mycobacterium_phage_baloo	N/A	<0.5
mycobacterium_phage_bangla1971	N/A	<0.5
mycobacterium_phage_banjo	N/A	<0.5
mycobacterium_phage_barnyard	N/A	<0.5
mycobacterium_phage_barrelroll_complete_sequence,	N/A	<0.5
mycobacterium_phage_barriga	N/A	<0.5
mycobacterium_phage_bartimeaus	N/A	<0.5
mycobacterium_phage_basquiat	N/A	<0.5
mycobacterium_phage_batteryck	N/A	<0.5
mycobacterium_phage_beanwater	N/A	<0.5
mycobacterium_phage_beest_complete_sequence,	N/A	<0.5
mycobacterium_phage_beezoo	N/A	<0.5
mycobacterium_phage_bella96	N/A	<0.5
mycobacterium_phage_belladonna	N/A	<0.5
mycobacterium_phage_benedict_complete_sequence,	N/A	<0.5
mycobacterium_phage_bernal13	N/A	<0.5
mycobacterium_phage_bernardo	N/A	<0.5
mycobacterium_phage_bethlehem	N/A	<0.5
mycobacterium_phage_bigfoot	N/A	<0.5
mycobacterium_phage_biglebops	N/A	<0.5
mycobacterium_phage_bigmama	N/A	<0.5
mycobacterium_phage_bigswole	N/A	<0.5
mycobacterium_phage_bipolarisk	N/A	<0.5
mycobacterium_phage_bipper	N/A	<0.5
mycobacterium_phage_bircsak	N/A	<0.5
mycobacterium_phage_bishoperium	N/A	<0.5
mycobacterium_phage_blackbeetle	N/A	<0.5
mycobacterium_phage_blackmoor	N/A	<0.5
mycobacterium_phage_blackstallion	N/A	<0.5
mycobacterium_phage_bobswaget	N/A	<0.5
mycobacterium_phage_bombshell	N/A	<0.5
mycobacterium_phage_bongo_complete_sequence,	N/A	<0.5
mycobacterium_phage_bonray	N/A	<0.5
mycobacterium_phage_boomer	N/A	<0.5
mycobacterium_phage_bowtie	N/A	<0.5
mycobacterium_phage_bps	N/A	<0.5
mycobacterium_phage_bquat_complete_sequence,	N/A	<0.5
mycobacterium_phage_breeniome_complete_sequence,	N/A	<0.5
mycobacterium_phage_bricole	N/A	<0.5
mycobacterium_phage_broseidon	N/A	<0.5
mycobacterium_phage_browncna	N/A	<0.5
mycobacterium_phage_bruceb	N/A	<0.5
mycobacterium_phage_bruiser	N/A	<0.5
mycobacterium_phage_brujita	N/A	<0.5
mycobacterium_phage_bruns_complete_sequence,	N/A	<0.5
mycobacterium_phage_brusacoram	N/A	<0.5
mycobacterium_phage_bubbletrouble	N/A	<0.5
mycobacterium_phage_buckeye	N/A	<0.5
mycobacterium_phage_bud	N/A	<0.5
mycobacterium_phage_bumblebee11	N/A	<0.5
mycobacterium_phage_bunnies	N/A	<0.5
mycobacterium_phage_burger	N/A	<0.5
mycobacterium_phage_burrough	N/A	<0.5
mycobacterium_phage_butterscotch	N/A	<0.5
mycobacterium_phage_butters	N/A	<0.5
mycobacterium_phage_buzzbuzz	N/A	<0.5
mycobacterium_phage_bxz1	N/A	<0.5
mycobacterium_phage_caelakin	N/A	<0.5
mycobacterium_phage_cali	N/A	<0.5
mycobacterium_phage_cambiare	N/A	<0.5
mycobacterium_phage_caml	N/A	<0.5
mycobacterium_phage_camperdownii	N/A	<0.5
mycobacterium_phage_cane17	N/A	<0.5
mycobacterium_phage_cannibal	N/A	<0.5
mycobacterium_phage_capricorn	N/A	<0.5
mycobacterium_phage_carcharodon	N/A	<0.5
mycobacterium_phage_catalina	N/A	<0.5
mycobacterium_phage_catdawg	N/A	<0.5
mycobacterium_phage_catera	N/A	<0.5
mycobacterium_phage_cborch11	N/A	<0.5
mycobacterium_phage_cedasite	N/A	<0.5
mycobacterium_phage_centrecat	N/A	<0.5
mycobacterium_phage_chaching	N/A	<0.5
mycobacterium_phage_chadwick_complete_sequence,	N/A	<0.5
mycobacterium_phage_chah	N/A	<0.5
mycobacterium_phage_chance64	N/A	<0.5
mycobacterium_phage_chancellor	N/A	<0.5
mycobacterium_phage_chandler_complete_sequence,	N/A	<0.5
mycobacterium_phage_changeling	N/A	<0.5
mycobacterium_phage_chargie21	N/A	<0.5
mycobacterium_phage_charlieb	N/A	<0.5
mycobacterium_phage_charlie_complete_sequence,	N/A	<0.5
mycobacterium_phage_charliegbrown	N/A	<0.5
mycobacterium_phage_charm	N/A	<0.5
mycobacterium_phage_che12	N/A	<0.5
mycobacterium_phage_cheetobro	N/A	<0.5
mycobacterium_phage_cheeto	N/A	<0.5
mycobacterium_phage_cherrybomb426_complete_sequence,	N/A	<0.5
mycobacterium_phage_chickenphender	N/A	<0.5
mycobacterium_phage_chill	N/A	<0.5
mycobacterium_phage_chorkpop	N/A	<0.5
mycobacterium_phage_chrisnmich_complete_sequence,	N/A	<0.5
mycobacterium_phage_chunky	N/A	<0.5
mycobacterium_phage_chupacabra	N/A	<0.5
mycobacterium_phage_cicholasnage	N/A	<0.5
mycobacterium_phage_cindaradix	N/A	<0.5
mycobacterium_phage_citius	N/A	<0.5
mycobacterium_phage_clarenza	N/A	<0.5
mycobacterium_phage_cled96	N/A	<0.5
mycobacterium_phage_cloudwang3	N/A	<0.5
mycobacterium_phage_cobra	N/A	<0.5
mycobacterium_phage_cocoaberry	N/A	<0.5
mycobacterium_phage_colbert	N/A	<0.5
mycobacterium_phage_collard	N/A	<0.5
mycobacterium_phage_colt	N/A	<0.5
mycobacterium_phage_compostia	N/A	<0.5
mycobacterium_phage_connomayer	N/A	<0.5
mycobacterium_phage_conquerage	N/A	<0.5
mycobacterium_phage_conspiracy	N/A	<0.5
mycobacterium_phage_coog	N/A	<0.5
mycobacterium_phage_cooper_complete_sequence,	N/A	<0.5
mycobacterium_phage_corazon	N/A	<0.5
mycobacterium_phage_cornie	N/A	<0.5
mycobacterium_phage_corofin	N/A	<0.5
mycobacterium_phage_cosmo	N/A	<0.5
mycobacterium_phage_cosmolli16	N/A	<0.5
mycobacterium_phage_craff	N/A	<0.5
mycobacterium_phage_crespo	N/A	<0.5
mycobacterium_phage_crew_complete_sequence,	N/A	<0.5
mycobacterium_phage_crimd	N/A	<0.5
mycobacterium_phage_crispicous1	N/A	<0.5
mycobacterium_phage_crossroads	N/A	<0.5
mycobacterium_phage_crownjwl_complete_sequence,	N/A	<0.5
mycobacterium_phage_crucio	N/A	<0.5
mycobacterium_phage_cuco_complete_sequence,	N/A	<0.5
mycobacterium_phage_cuke	N/A	<0.5
mycobacterium_phage_daegal	N/A	<0.5
mycobacterium_phage_daffodil	N/A	<0.5
mycobacterium_phage_daffy	N/A	<0.5
mycobacterium_phage_daishi	N/A	<0.5
mycobacterium_phage_daisy	N/A	<0.5
mycobacterium_phage_dalmatian	N/A	<0.5
mycobacterium_phage_dalmuri	N/A	<0.5
mycobacterium_phage_damien	N/A	<0.5
mycobacterium_phage_dandelion_complete_sequence,	N/A	<0.5
mycobacterium_phage_darionha	N/A	<0.5
mycobacterium_phage_darko	N/A	<0.5
mycobacterium_phage_darthp	N/A	<0.5
mycobacterium_phage_darthphader	N/A	<0.5
mycobacterium_phage_davinci	N/A	<0.5
mycobacterium_phage_dbqu4n	N/A	<0.5
mycobacterium_phage_deby	N/A	<0.5
mycobacterium_phage_deepsoil15	N/A	<0.5
mycobacterium_phage_delilah	N/A	<0.5
mycobacterium_phage_derek	N/A	<0.5
mycobacterium_phage_derpp	N/A	<0.5
mycobacterium_phage_dhanush_complete_sequence,	N/A	<0.5
mycobacterium_phage_dietrick	N/A	<0.5
mycobacterium_phage_dingo	N/A	<0.5
mycobacterium_phage_dione_complete_sequence,	N/A	<0.5
mycobacterium_phage_dirtydunning	N/A	<0.5
mycobacterium_phage_dismalfunk	N/A	<0.5
mycobacterium_phage_dismalstressor	N/A	<0.5
mycobacterium_phage_dixon	N/A	<0.5
mycobacterium_phage_dmpstrdiver	N/A	<0.5
mycobacterium_phage_doesntmatter	N/A	<0.5
mycobacterium_phage_donny	N/A	<0.5
mycobacterium_phage_donovan	N/A	<0.5
mycobacterium_phage_donsanchon	N/A	<0.5
mycobacterium_phage_drazdys	N/A	<0.5
mycobacterium_phage_dreamboat_complete_sequence,	N/A	<0.5
mycobacterium_phage_drphinkdaddy	N/A	<0.5
mycobacterium_phage_druantia	N/A	<0.5
mycobacterium_phage_ds6a	N/A	<0.5
mycobacterium_phage_dtdevon	N/A	<0.5
mycobacterium_phage_dublin	N/A	<0.5
mycobacterium_phage_duchessdung	N/A	<0.5
mycobacterium_phage_dudelittle	N/A	<0.5
mycobacterium_phage_duke13	N/A	<0.5
mycobacterium_phage_dulcie	N/A	<0.5
mycobacterium_phage_durga	N/A	<0.5
mycobacterium_phage_dylan	N/A	<0.5
mycobacterium_phage_dyoedafos	N/A	<0.5
mycobacterium_phage_eagleeye	N/A	<0.5
mycobacterium_phage_eapen	N/A	<0.5
mycobacterium_phage_ebony	N/A	<0.5
mycobacterium_phage_echild	N/A	<0.5
mycobacterium_phage_edtherson	N/A	<0.5
mycobacterium_phage_edugator	N/A	<0.5
mycobacterium_phage_eidsmoe	N/A	<0.5
mycobacterium_phage_ein37	N/A	<0.5
mycobacterium_phage_eltiger69_complete_sequence,	N/A	<0.5
mycobacterium_phage_emerson	N/A	<0.5
mycobacterium_phage_emmaelysia	N/A	<0.5
mycobacterium_phage_emptee	N/A	<0.5
mycobacterium_phage_emtothethree	N/A	<0.5
mycobacterium_phage_eniyanlrs	N/A	<0.5
mycobacterium_phage_enkosi	N/A	<0.5
mycobacterium_phage_erdmann	N/A	<0.5
mycobacterium_phage_eremos	N/A	<0.5
mycobacterium_phage_eris	N/A	<0.5
mycobacterium_phage_erk16	N/A	<0.5
mycobacterium_phage_erniej	N/A	<0.5
mycobacterium_phage_eros	N/A	<0.5
mycobacterium_phage_essence	N/A	<0.5
mycobacterium_phage_et08	N/A	<0.5
mycobacterium_phage_et2brutus	N/A	<0.5
mycobacterium_phage_euphoria_complete_sequence,	N/A	<0.5
mycobacterium_phage_evanesce	N/A	<0.5
mycobacterium_phage_evilgenius	N/A	<0.5
mycobacterium_phage_ewok	N/A	<0.5
mycobacterium_phage_expelliarmus	N/A	<0.5
mycobacterium_phage_explosionervosa	N/A	<0.5
mycobacterium_phage_faith1_complete_sequence,	N/A	<0.5
mycobacterium_phage_fameo	N/A	<0.5
mycobacterium_phage_fang	N/A	<0.5
mycobacterium_phage_fascinus_complete_sequence,	N/A	<0.5
mycobacterium_phage_ff47	N/A	<0.5
mycobacterium_phage_fibonacci	N/A	<0.5
mycobacterium_phage_filuzino	N/A	<0.5
mycobacterium_phage_findley	N/A	<0.5
mycobacterium_phage_fionnbharth_complete_sequence,	N/A	<0.5
mycobacterium_phage_firingline	N/A	<0.5
mycobacterium_phage_first	N/A	<0.5
mycobacterium_phage_flabslab	N/A	<0.5
mycobacterium_phage_flagstaff	N/A	<0.5
mycobacterium_phage_flaverint	N/A	<0.5
mycobacterium_phage_florean	N/A	<0.5
mycobacterium_phage_fludd	N/A	<0.5
mycobacterium_phage_fluffyninja	N/A	<0.5
mycobacterium_phage_flux_complete_sequence,	N/A	<0.5
mycobacterium_phage_forgetit	N/A	<0.5
mycobacterium_phage_fortunato	N/A	<0.5
mycobacterium_phage_fowlmouth	N/A	<0.5
mycobacterium_phage_foxtrotp1	N/A	<0.5
mycobacterium_phage_francis47	N/A	<0.5
mycobacterium_phage_fraybell	N/A	<0.5
mycobacterium_phage_frederick_complete_sequence,	N/A	<0.5
mycobacterium_phage_friarpreacher	N/A	<0.5
mycobacterium_phage_fringe	N/A	<0.5
mycobacterium_phage_froghopper	N/A	<0.5
mycobacterium_phage_frosty24	N/A	<0.5
mycobacterium_phage_fugateosu	N/A	<0.5
mycobacterium_phage_funston	N/A	<0.5
mycobacterium_phage_fushigi_complete_sequence,	N/A	<0.5
mycobacterium_phage_gabriel	N/A	<0.5
mycobacterium_phage_gadjet_complete_sequence,	N/A	<0.5
mycobacterium_phage_gadost	N/A	<0.5
mycobacterium_phage_gancho	N/A	<0.5
mycobacterium_phage_gardensalsa	N/A	<0.5
mycobacterium_phage_gareth	N/A	<0.5
mycobacterium_phage_gattaca	N/A	<0.5
mycobacterium_phage_genecoco	N/A	<0.5
mycobacterium_phage_genevab15	N/A	<0.5
mycobacterium_phage_gengar	N/A	<0.5
mycobacterium_phage_george	N/A	<0.5
mycobacterium_phage_geraldini	N/A	<0.5
mycobacterium_phage_ghost_complete_sequence,	N/A	<0.5
mycobacterium_phage_gideon	N/A	<0.5
mycobacterium_phage_gizmo	N/A	<0.5
mycobacterium_phage_glaske	N/A	<0.5
mycobacterium_phage_godines	N/A	<0.5
mycobacterium_phage_godphather	N/A	<0.5
mycobacterium_phage_gomashi	N/A	<0.5
mycobacterium_phage_gompelli16	N/A	<0.5
mycobacterium_phage_goose_complete_sequence,	N/A	<0.5
mycobacterium_phage_gophee	N/A	<0.5
mycobacterium_phage_grand2040	N/A	<0.5
mycobacterium_phage_grizzly	N/A	<0.5
mycobacterium_phage_groupthink	N/A	<0.5
mycobacterium_phage_gruunaga	N/A	<0.5
mycobacterium_phage_guanica15	N/A	<0.5
mycobacterium_phage_guillsminger	N/A	<0.5
mycobacterium_phage_gumball	N/A	<0.5
mycobacterium_phage_gumbie_complete_sequence,	N/A	<0.5
mycobacterium_phage_gyarad	N/A	<0.5
mycobacterium_phage_haimas	N/A	<0.5
mycobacterium_phage_haleema	N/A	<0.5
mycobacterium_phage_halo	N/A	<0.5
mycobacterium_phage_hamish	N/A	<0.5
mycobacterium_phage_hammer	N/A	<0.5
mycobacterium_phage_hammy	N/A	<0.5
mycobacterium_phage_hamslice	N/A	<0.5
mycobacterium_phage_hangman	N/A	<0.5
mycobacterium_phage_hannaconda	N/A	<0.5
mycobacterium_phage_hanshotfirst	N/A	<0.5
mycobacterium_phage_harvey	N/A	<0.5
mycobacterium_phage_hawkeye	N/A	<0.5
mycobacterium_phage_heathcliff	N/A	<0.5
mycobacterium_phage_hedwigodu	N/A	<0.5
mycobacterium_phage_heldan_complete_sequence,	N/A	<0.5
mycobacterium_phage_held_complete_sequence,	N/A	<0.5
mycobacterium_phage_hertubise_	N/A	<0.5
mycobacterium_phage_hetaeria	N/A	<0.5
mycobacterium_phage_hexamo	N/A	<0.5
mycobacterium_phage_hh92	N/A	<0.5
mycobacterium_phage_highstump	N/A	<0.5
mycobacterium_phage_hinder_complete_sequence,	N/A	<0.5
mycobacterium_phage_holli	N/A	<0.5
mycobacterium_phage_hookmount	N/A	<0.5
mycobacterium_phage_hope4ever	N/A	<0.5
mycobacterium_phage_hope	N/A	<0.5
mycobacterium_phage_horchata	N/A	<0.5
mycobacterium_phage_hortumsl17	N/A	<0.5
mycobacterium_phage_hosp	N/A	<0.5
mycobacterium_phage_hotshotbaby7	N/A	<0.5
mycobacterium_phage_hsavage	N/A	<0.5
mycobacterium_phage_hughesyang	N/A	<0.5
mycobacterium_phage_huhtaenerson15	N/A	<0.5
mycobacterium_phage_hurricane	N/A	<0.5
mycobacterium_phage_hutc2	N/A	<0.5
mycobacterium_phage_hyro	N/A	<0.5
mycobacterium_phage_ibrahim	N/A	<0.5
mycobacterium_phage_icleared_complete_sequence,	N/A	<0.5
mycobacterium_phage_ihop	N/A	<0.5
mycobacterium_phage_imtiyazsitla	N/A	<0.5
mycobacterium_phage_inigomontoya	N/A	<0.5
mycobacterium_phage_interfolia	N/A	<0.5
mycobacterium_phage_iota	N/A	<0.5
mycobacterium_phage_iphane	N/A	<0.5
mycobacterium_phage_iracema64	N/A	<0.5
mycobacterium_phage_isaaceli_complete_sequence,	N/A	<0.5
mycobacterium_phage_island3	N/A	<0.5
mycobacterium_phage_jaan	N/A	<0.5
mycobacterium_phage_jabiru	N/A	<0.5
mycobacterium_phage_jabith	N/A	<0.5
mycobacterium_phage_jacattac	N/A	<0.5
mycobacterium_phage_jackstina	N/A	<0.5
mycobacterium_phage_jackyb	N/A	<0.5
mycobacterium_phage_jakeo	N/A	<0.5
mycobacterium_phage_jamal	N/A	<0.5
mycobacterium_phage_jane	N/A	<0.5
mycobacterium_phage_jangophett	N/A	<0.5
mycobacterium_phage_jasper	N/A	<0.5
mycobacterium_phage_jaws_complete_sequence,	N/A	<0.5
mycobacterium_phage_jaykayelowell	N/A	<0.5
mycobacterium_phage_jc27	N/A	<0.5
mycobacterium_phage_jeckyll	N/A	<0.5
mycobacterium_phage_jeffabunny_complete_sequence,	N/A	<0.5
mycobacterium_phage_jeon	N/A	<0.5
mycobacterium_phage_jetblade	N/A	<0.5
mycobacterium_phage_jhc117	N/A	<0.5
mycobacterium_phage_jillium	N/A	<0.5
mycobacterium_phage_jolie1	N/A	<0.5
mycobacterium_phage_jolie2	N/A	<0.5
mycobacterium_phage_joongjeon	N/A	<0.5
mycobacterium_phage_joselito	N/A	<0.5
mycobacterium_phage_journey13	N/A	<0.5
mycobacterium_phage_jovo	N/A	<0.5
mycobacterium_phage_joy99	N/A	<0.5
mycobacterium_phage_justhall	N/A	<0.5
mycobacterium_phage_kady	N/A	<0.5
mycobacterium_phage_kailash	N/A	<0.5
mycobacterium_phage_kalb97	N/A	<0.5
mycobacterium_phage_kalpine	N/A	<0.5
mycobacterium_phage_kamiyu	N/A	<0.5
mycobacterium_phage_kandz	N/A	<0.5
mycobacterium_phage_kareem	N/A	<0.5
mycobacterium_phage_kasen3	N/A	<0.5
mycobacterium_phage_kashflow	N/A	<0.5
mycobacterium_phage_katalie136	N/A	<0.5
mycobacterium_phage_kayacho	N/A	<0.5
mycobacterium_phage_kbg	N/A	<0.5
mycobacterium_phage_keitherie	N/A	<0.5
mycobacterium_phage_kerberos	N/A	<0.5
mycobacterium_phage_keshu	N/A	<0.5
mycobacterium_phage_kfpoly	N/A	<0.5
mycobacterium_phage_khaleesi	N/A	<0.5
mycobacterium_phage_kikipoo	N/A	<0.5
mycobacterium_phage_killigrew	N/A	<0.5
mycobacterium_phage_kimona	N/A	<0.5
mycobacterium_phage_kinbote	N/A	<0.5
mycobacterium_phage_kingmustik0402	N/A	<0.5
mycobacterium_phage_kingsolomon	N/A	<0.5
mycobacterium_phage_kingtut	N/A	<0.5
mycobacterium_phage_kingveveve	N/A	<0.5
mycobacterium_phage_kisi	N/A	<0.5
mycobacterium_phage_kittenmittens	N/A	<0.5
mycobacterium_phage_klein	N/A	<0.5
mycobacterium_phage_kloppinator	N/A	<0.5
mycobacterium_phage_klucky39	N/A	<0.5
mycobacterium_phage_koguma	N/A	<0.5
mycobacterium_phage_koko	N/A	<0.5
mycobacterium_phage_konstantine	N/A	<0.5
mycobacterium_phage_kratark	N/A	<0.5
mycobacterium_phage_kratio_complete_sequence,	N/A	<0.5
mycobacterium_phage_kristoff	N/A	<0.5
mycobacterium_phage_krypton555	N/A	<0.5
mycobacterium_phage_kugel	N/A	<0.5
mycobacterium_phage_kumao	N/A	<0.5
mycobacterium_phage_kwadwo	N/A	<0.5
mycobacterium_phage_kwksand96	N/A	<0.5
mycobacterium_phage_kyee	N/A	<0.5
mycobacterium_phage_kykar	N/A	<0.5
mycobacterium_phage_labeouficaum	N/A	<0.5
mycobacterium_phage_ladybird	N/A	<0.5
mycobacterium_phage_larenn	N/A	<0.5
mycobacterium_phage_larva	N/A	<0.5
mycobacterium_phage_lasso	N/A	<0.5
mycobacterium_phage_lasthope	N/A	<0.5
mycobacterium_phage_laterm	N/A	<0.5
mycobacterium_phage_leelot	N/A	<0.5
mycobacterium_phage_lego3393	N/A	<0.5
mycobacterium_phage_legolas	N/A	<0.5
mycobacterium_phage_lemond	N/A	<0.5
mycobacterium_phage_lemonslice	N/A	<0.5
mycobacterium_phage_lemur	N/A	<0.5
mycobacterium_phage_leogania	N/A	<0.5
mycobacterium_phage_lesedi	N/A	<0.5
mycobacterium_phage_leston	N/A	<0.5
mycobacterium_phage_lev2	N/A	<0.5
mycobacterium_phage_lhtscc	N/A	<0.5
mycobacterium_phage_liefie_complete_sequence,	N/A	<0.5
mycobacterium_phage_lifesavor	N/A	<0.5
mycobacterium_phage_lilbit	N/A	<0.5
mycobacterium_phage_lilhazelnut	N/A	<0.5
mycobacterium_phage_lilhomiep	N/A	<0.5
mycobacterium_phage_lilmoolah	N/A	<0.5
mycobacterium_phage_lilpharaoh	N/A	<0.5
mycobacterium_phage_lilturb	N/A	<0.5
mycobacterium_phage_lindnt	N/A	<0.5
mycobacterium_phage_linstu	N/A	<0.5
mycobacterium_phage_littleb	N/A	<0.5
mycobacterium_phage_littlecherry_complete_sequence,	N/A	<0.5
mycobacterium_phage_littleguy	N/A	<0.5
mycobacterium_phage_littlelaf	N/A	<0.5
mycobacterium_phage_littleton	N/A	<0.5
mycobacterium_phage_lizziana	N/A	<0.5
mycobacterium_phage_llij	N/A	<0.5
mycobacterium_phage_loanshark	N/A	<0.5
mycobacterium_phage_lockley	N/A	<0.5
mycobacterium_phage_lokk	N/A	<0.5
mycobacterium_phage_lolly9	N/A	<0.5
mycobacterium_phage_longacauda	N/A	<0.5
mycobacterium_phage_lopton	N/A	<0.5
mycobacterium_phage_lorenzo	N/A	<0.5
mycobacterium_phage_loser	N/A	<0.5
mycobacterium_phage_louie6	N/A	<0.5
mycobacterium_phage_louisv14	N/A	<0.5
mycobacterium_phage_lrrhood	N/A	<0.5
mycobacterium_phage_luchador	N/A	<0.5
mycobacterium_phage_lucivia	N/A	<0.5
mycobacterium_phage_lucky2013,	N/A	<0.5
mycobacterium_phage_luckymarjie	N/A	<0.5
mycobacterium_phage_lugya	N/A	<0.5
mycobacterium_phage_lukilu	N/A	<0.5
mycobacterium_phage_lulumae	N/A	<0.5
mycobacterium_phage_lumos	N/A	<0.5
mycobacterium_phage_lysocool	N/A	<0.5
mycobacterium_phage_mabel	N/A	<0.5
mycobacterium_phage_macncheese	N/A	<0.5
mycobacterium_phage_madruga	N/A	<0.5
mycobacterium_phage_mag7	N/A	<0.5
mycobacterium_phage_magsby	N/A	<0.5
mycobacterium_phage_makemake	N/A	<0.5
mycobacterium_phage_manad	N/A	<0.5
mycobacterium_phage_mana	N/A	<0.5
mycobacterium_phage_manatee_complete_sequence,	N/A	<0.5
mycobacterium_phage_mangethe	N/A	<0.5
mycobacterium_phage_marcell_complete_sequence,	N/A	<0.5
mycobacterium_phage_marcoliusprime	N/A	<0.5
mycobacterium_phage_margo	N/A	<0.5
mycobacterium_phage_marquardt	N/A	<0.5
mycobacterium_phage_marvin	N/A	<0.5
mycobacterium_phage_maryswell	N/A	<0.5
mycobacterium_phage_maskar	N/A	<0.5
mycobacterium_phage_maverick_complete_sequence,	N/A	<0.5
mycobacterium_phage_mazhar510	N/A	<0.5
mycobacterium_phage_mecca	N/A	<0.5
mycobacterium_phage_meezee_complete_sequence,	N/A	<0.5
mycobacterium_phage_megabear	N/A	<0.5
mycobacterium_phage_megamind	N/A	<0.5
mycobacterium_phage_megatron	N/A	<0.5
mycobacterium_phage_melissauren88	N/A	<0.5
mycobacterium_phage_melpomini	N/A	<0.5
mycobacterium_phage_mendokysei	N/A	<0.5
mycobacterium_phage_mesh1	N/A	<0.5
mycobacterium_phage_methuselah_complete_sequence,	N/A	<0.5
mycobacterium_phage_michaelphcott	N/A	<0.5
mycobacterium_phage_mikeliesin	N/A	<0.5
mycobacterium_phage_miko	N/A	<0.5
mycobacterium_phage_mikota	N/A	<0.5
mycobacterium_phage_millski	N/A	<0.5
mycobacterium_phage_misomonster	N/A	<0.5
mycobacterium_phage_misswhite	N/A	<0.5
mycobacterium_phage_mitkao_complete_sequence,	N/A	<0.5
mycobacterium_phage_momo	N/A	<0.5
mycobacterium_phage_momomixon_complete_sequence,	N/A	<0.5
mycobacterium_phage_moorethemaryer	N/A	<0.5
mycobacterium_phage_morgushi_complete_sequence,	N/A	<0.5
mycobacterium_phage_morizzled23	N/A	<0.5
mycobacterium_phage_morpher26	N/A	<0.5
mycobacterium_phage_mortcellus	N/A	<0.5
mycobacterium_phage_morty	N/A	<0.5
mycobacterium_phage_mosaic	N/A	<0.5
mycobacterium_phage_mosmoris	N/A	<0.5
mycobacterium_phage_mplant7149_complete_sequence,	N/A	<0.5
mycobacterium_phage_mrabcd	N/A	<0.5
mycobacterium_phage_mryolo	N/A	<0.5
mycobacterium_phage_muddy	N/A	<0.5
mycobacterium_phage_mufasa	N/A	<0.5
mycobacterium_phage_mulan	N/A	<0.5
mycobacterium_phage_mulciber	N/A	<0.5
mycobacterium_phage_mule	N/A	<0.5
mycobacterium_phage_munch	N/A	<0.5
mycobacterium_phage_mundrea_complete_sequence,	N/A	<0.5
mycobacterium_phage_murdoc_complete_sequence,	N/A	<0.5
mycobacterium_phage_murucutumbu	N/A	<0.5
mycobacterium_phage_mutante	N/A	<0.5
mycobacterium_phage_mynx	N/A	<0.5
mycobacterium_phage_myradee	N/A	<0.5
mycobacterium_phage_myrna	N/A	<0.5
mycobacterium_phage_myxus_complete_sequence,	N/A	<0.5
mycobacterium_phage_naca	N/A	<0.5
mycobacterium_phage_nacho	N/A	<0.5
mycobacterium_phage_naija	N/A	<0.5
mycobacterium_phage_nairb	N/A	<0.5
mycobacterium_phage_naji	N/A	<0.5
mycobacterium_phage_nanosmite	N/A	<0.5
mycobacterium_phage_napoleon13	N/A	<0.5
mycobacterium_phage_nappy_	N/A	<0.5
mycobacterium_phage_nazo	N/A	<0.5
mycobacterium_phage_nearlyheadless	N/A	<0.5
mycobacterium_phage_nebkiss	N/A	<0.5
mycobacterium_phage_nemo27	N/A	<0.5
mycobacterium_phage_newman_complete_sequence,	N/A	<0.5
mycobacterium_phage_nibb	N/A	<0.5
mycobacterium_phage_nicholas	N/A	<0.5
mycobacterium_phage_nicolasphaqe	N/A	<0.5
mycobacterium_phage_nicoletera	N/A	<0.5
mycobacterium_phage_nigel	N/A	<0.5
mycobacterium_phage_niklas	N/A	<0.5
mycobacterium_phage_nilo	N/A	<0.5
mycobacterium_phage_niza	N/A	<0.5
mycobacterium_phage_noodletree	N/A	<0.5
mycobacterium_phage_norbert_complete_sequence,	N/A	<0.5
mycobacterium_phage_norm	N/A	<0.5
mycobacterium_phage_northstar	N/A	<0.5
mycobacterium_phage_nova	N/A	<0.5
mycobacterium_phage_nozo	N/A	<0.5
mycobacterium_phage_nuevomundo_complete_sequence,	N/A	<0.5
mycobacterium_phage_numberten_complete_sequence,	N/A	<0.5
mycobacterium_phage_nyxis	N/A	<0.5
mycobacterium_phage_oaker	N/A	<0.5
mycobacterium_phage_obupride	N/A	<0.5
mycobacterium_phage_octaviousrex	N/A	<0.5
mycobacterium_phage_odin	N/A	<0.5
mycobacterium_phage_okcentral2016	N/A	<0.5
mycobacterium_phage_okiroe	N/A	<0.5
mycobacterium_phage_olanp	N/A	<0.5
mycobacterium_phage_olga	N/A	<0.5
mycobacterium_phage_oline_complete_sequence,	N/A	<0.5
mycobacterium_phage_olive	N/A	<0.5
mycobacterium_phage_oliverwalter	N/A	<0.5
mycobacterium_phage_omnicron	N/A	<0.5
mycobacterium_phage_omniscient	N/A	<0.5
mycobacterium_phage_oosterbaan_complete_sequence,	N/A	<0.5
mycobacterium_phage_optimus_complete_sequence,	N/A	<0.5
mycobacterium_phage_orangeoswald	N/A	<0.5
mycobacterium_phage_orion	N/A	<0.5
mycobacterium_phage_oscar	N/A	<0.5
mycobacterium_phage_osmaximus_complete_sequence,	N/A	<0.5
mycobacterium_phage_pacerpaul	N/A	<0.5
mycobacterium_phage_packman_complete_sequence,	N/A	<0.5
mycobacterium_phage_paito	N/A	<0.5
mycobacterium_phage_palestino	N/A	<0.5
mycobacterium_phage_panamaxus	N/A	<0.5
mycobacterium_phage_paola	N/A	<0.5
mycobacterium_phage_papyrus	N/A	<0.5
mycobacterium_phage_parktd	N/A	<0.5
mycobacterium_phage_patience_complete_sequence,	N/A	<0.5
mycobacterium_phage_patter	N/A	<0.5
mycobacterium_phage_pattyp_complete_sequence,	N/A	<0.5
mycobacterium_phage_pbi1	N/A	<0.5
mycobacterium_phage_peaches	N/A	<0.5
mycobacterium_phage_peanam	N/A	<0.5
mycobacterium_phage_pegleg	N/A	<0.5
mycobacterium_phage_pepe	N/A	<0.5
mycobacterium_phage_peterpeter	N/A	<0.5
mycobacterium_phage_petp2012	N/A	<0.5
mycobacterium_phage_pg1	N/A	<0.5
mycobacterium_phage_ph8s	N/A	<0.5
mycobacterium_phage_phabba	N/A	<0.5
mycobacterium_phage_phacado	N/A	<0.5
mycobacterium_phage_phaeder	N/A	<0.5
mycobacterium_phage_phaedrus	N/A	<0.5
mycobacterium_phage_phamished	N/A	<0.5
mycobacterium_phage_phantastic	N/A	<0.5
mycobacterium_phage_phareon	N/A	<0.5
mycobacterium_phage_phatcats2014	N/A	<0.5
mycobacterium_phage_phayonce	N/A	<0.5
mycobacterium_phage_phelemich	N/A	<0.5
mycobacterium_phage_phelpsodu	N/A	<0.5
mycobacterium_phage_phenghiskhan	N/A	<0.5
mycobacterium_phage_phergie	N/A	<0.5
mycobacterium_phage_phighter1804	N/A	<0.5
mycobacterium_phage_philonius	N/A	<0.5
mycobacterium_phage_phipps	N/A	<0.5
mycobacterium_phage_phish	N/A	<0.5
mycobacterium_phage_phlegm	N/A	<0.5
mycobacterium_phage_phlei	N/A	<0.5
mycobacterium_phage_phleuron	N/A	<0.5
mycobacterium_phage_phlorence	N/A	<0.5
mycobacterium_phage_phlyer	N/A	<0.5
mycobacterium_phage_phonnegut	N/A	<0.5
mycobacterium_phage_phox	N/A	<0.5
mycobacterium_phage_phoxy	N/A	<0.5
mycobacterium_phage_phrankreynolds	N/A	<0.5
mycobacterium_phage_phrann	N/A	<0.5
mycobacterium_phage_phrappuccino	N/A	<0.5
mycobacterium_phage_phreak	N/A	<0.5
mycobacterium_phage_phrodobaggins	N/A	<0.5
mycobacterium_phage_phrostymug	N/A	<0.5
mycobacterium_phage_phunky	N/A	<0.5
mycobacterium_phage_phusco	N/A	<0.5
mycobacterium_phage_pier	N/A	<0.5
mycobacterium_phage_piglet	N/A	<0.5
mycobacterium_phage_pinkman	N/A	<0.5
mycobacterium_phage_pinnie	N/A	<0.5
mycobacterium_phage_pio	N/A	<0.5
mycobacterium_phage_pioneer	N/A	<0.5
mycobacterium_phage_pipcraft	N/A	<0.5
mycobacterium_phage_pipsqueak	N/A	<0.5
mycobacterium_phage_pita2	N/A	<0.5
mycobacterium_phage_pivoine	N/A	<0.5
mycobacterium_phage_placalicious	N/A	<0.5
mycobacterium_phage_pleione_complete_sequence,	N/A	<0.5
mycobacterium_phage_plmatters	N/A	<0.5
mycobacterium_phage_plot	N/A	<0.5
mycobacterium_phage_pocahontas	N/A	<0.5
mycobacterium_phage_podrick	N/A	<0.5
mycobacterium_phage_poise	N/A	<0.5
mycobacterium_phage_pomar16	N/A	<0.5
mycobacterium_phage_popcicle	N/A	<0.5
mycobacterium_phage_pops	N/A	<0.5
mycobacterium_phage_porcelain	N/A	<0.5
mycobacterium_phage_potter	N/A	<0.5
mycobacterium_phage_pound	N/A	<0.5
mycobacterium_phage_predator	N/A	<0.5
mycobacterium_phage_prithvi	N/A	<0.5
mycobacterium_phage_professorx	N/A	<0.5
mycobacterium_phage_puhltonio	N/A	<0.5
mycobacterium_phage_puppy	N/A	<0.5
mycobacterium_phage_purgamenstris	N/A	<0.5
mycobacterium_phage_purky	N/A	<0.5
mycobacterium_phage_qbert	N/A	<0.5
mycobacterium_phage_qobbit	N/A	<0.5
mycobacterium_phage_queenb2	N/A	<0.5
mycobacterium_phage_queenbeane	N/A	<0.5
mycobacterium_phage_queenbeesly	N/A	<0.5
mycobacterium_phage_quinnkiro	N/A	<0.5
mycobacterium_phage_qyrzula	N/A	<0.5
mycobacterium_phage_rachaly	N/A	<0.5
mycobacterium_phage_ragingrooster	N/A	<0.5
mycobacterium_phage_ramen	N/A	<0.5
mycobacterium_phage_rando14	N/A	<0.5
mycobacterium_phage_rapunzel97	N/A	<0.5
mycobacterium_phage_rawrgerthat	N/A	<0.5
mycobacterium_phage_rebeuca	N/A	<0.5
mycobacterium_phage_redi_complete_sequence,	N/A	<0.5
mycobacterium_phage_redmaple	N/A	<0.5
mycobacterium_phage_refuge	N/A	<0.5
mycobacterium_phage_relief	N/A	<0.5
mycobacterium_phage_rem711	N/A	<0.5
mycobacterium_phage_remy19	N/A	<0.5
mycobacterium_phage_renaissance	N/A	<0.5
mycobacterium_phage_reprobate	N/A	<0.5
mycobacterium_phage_revised_giles_complete_sequence,	N/A	<0.5
mycobacterium_phage_rey	N/A	<0.5
mycobacterium_phage_rhyno	N/A	<0.5
mycobacterium_phage_rich	N/A	<0.5
mycobacterium_phage_ridgecb_complete_sequence,	N/A	<0.5
mycobacterium_phage_riggan	N/A	<0.5
mycobacterium_phage_rizal	N/A	<0.5
mycobacterium_phage_roary	N/A	<0.5
mycobacterium_phage_roliet	N/A	<0.5
mycobacterium_phage_romat	N/A	<0.5
mycobacterium_phage_romney2012	N/A	<0.5
mycobacterium_phage_roosevelt	N/A	<0.5
mycobacterium_phage_roots515	N/A	<0.5
mycobacterium_phage_roscoe_complete_sequence,	N/A	<0.5
mycobacterium_phage_roy17	N/A	<0.5
mycobacterium_phage_ruin	N/A	<0.5
mycobacterium_phage_ryadel	N/A	<0.5
mycobacterium_phage_sabertooth_complete_sequence,	N/A	<0.5
mycobacterium_phage_sabinator	N/A	<0.5
mycobacterium_phage_sagefire	N/A	<0.5
mycobacterium_phage_saguaro	N/A	<0.5
mycobacterium_phage_saintus_complete_sequence,	N/A	<0.5
mycobacterium_phage_salacia	N/A	<0.5
mycobacterium_phage_salz	N/A	<0.5
mycobacterium_phage_samaymay	N/A	<0.5
mycobacterium_phage_samscheppers	N/A	<0.5
mycobacterium_phage_samty	N/A	<0.5
mycobacterium_phage_samuellplaqson	N/A	<0.5
mycobacterium_phage_sarfire	N/A	<0.5
mycobacterium_phage_sassycat97	N/A	<0.5
mycobacterium_phage_schadenfreude	N/A	<0.5
mycobacterium_phage_scherzo	N/A	<0.5
mycobacterium_phage_schiebel	N/A	<0.5
mycobacterium_phage_schoolbus	N/A	<0.5
mycobacterium_phage_scoot17c	N/A	<0.5
mycobacterium_phage_scorpia	N/A	<0.5
mycobacterium_phage_scottmcg	N/A	<0.5
mycobacterium_phage_scowl	N/A	<0.5
mycobacterium_phage_sdcharge11	N/A	<0.5
mycobacterium_phage_seabiscuit_complete_sequence,	N/A	<0.5
mycobacterium_phage_sebata	N/A	<0.5
mycobacterium_phage_send513_complete_sequence,	N/A	<0.5
mycobacterium_phage_serendipitous	N/A	<0.5
mycobacterium_phage_serendipity_complete_sequence,	N/A	<0.5
mycobacterium_phage_serpentine	N/A	<0.5
mycobacterium_phage_sgtbeansprout	N/A	<0.5
mycobacterium_phage_shaka_complete_sequence,	N/A	<0.5
mycobacterium_phage_shaobing	N/A	<0.5
mycobacterium_phage_shaqnato	N/A	<0.5
mycobacterium_phage_sheakeira	N/A	<0.5
mycobacterium_phage_shedlockholmes	N/A	<0.5
mycobacterium_phage_sheen	N/A	<0.5
mycobacterium_phage_sheila	N/A	<0.5
mycobacterium_phage_shialabeouf	N/A	<0.5
mycobacterium_phage_shilan_complete_sequence,	N/A	<0.5
mycobacterium_phage_shival_complete_sequence,	N/A	<0.5
mycobacterium_phage_shnickers	N/A	<0.5
mycobacterium_phage_shrimp_complete_sequence,	N/A	<0.5
mycobacterium_phage_sibs6	N/A	<0.5
mycobacterium_phage_sigman	N/A	<0.5
mycobacterium_phage_silvafighter	N/A	<0.5
mycobacterium_phage_sirharley	N/A	<0.5
mycobacterium_phage_skinnypete	N/A	<0.5
mycobacterium_phage_skipitt	N/A	<0.5
mycobacterium_phage_slimphazie	N/A	<0.5
mycobacterium_phage_smairt	N/A	<0.5
mycobacterium_phage_smallfry	N/A	<0.5
mycobacterium_phage_smeadley_complete_sequence,	N/A	<0.5
mycobacterium_phage_smeagol	N/A	<0.5
mycobacterium_phage_smooch	N/A	<0.5
mycobacterium_phage_snape	N/A	<0.5
mycobacterium_phage_snaptap	N/A	<0.5
mycobacterium_phage_sneeze	N/A	<0.5
mycobacterium_phage_snenia	N/A	<0.5
mycobacterium_phage_sophia	N/A	<0.5
mycobacterium_phage_soshari	N/A	<0.5
mycobacterium_phage_soto	N/A	<0.5
mycobacterium_phage_sparky_complete_sequence,	N/A	<0.5
mycobacterium_phage_spartan300_complete_sequence,	N/A	<0.5
mycobacterium_phage_specks	N/A	<0.5
mycobacterium_phage_spike509	N/A	<0.5
mycobacterium_phage_spongebob	N/A	<0.5
mycobacterium_phage_sprinklers	N/A	<0.5
mycobacterium_phage_spud	N/A	<0.5
mycobacterium_phage_squid	N/A	<0.5
mycobacterium_phage_squiggle	N/A	<0.5
mycobacterium_phage_starstuff	N/A	<0.5
mycobacterium_phage_stephig9,	N/A	<0.5
mycobacterium_phage_stinger_complete_sequence,	N/A	<0.5
mycobacterium_phage_struggle_complete_sequence,	N/A	<0.5
mycobacterium_phage_stubby	N/A	<0.5
mycobacterium_phage_suffolk_complete_sequence,	N/A	<0.5
mycobacterium_phage_sulley	N/A	<0.5
mycobacterium_phage_superawesome	N/A	<0.5
mycobacterium_phage_superphikiman	N/A	<0.5
mycobacterium_phage_surely	N/A	<0.5
mycobacterium_phage_sweets	N/A	<0.5
mycobacterium_phage_swirley	N/A	<0.5
mycobacterium_phage_swish	N/A	<0.5
mycobacterium_phage_ta17a	N/A	<0.5
mycobacterium_phage_tachez	N/A	<0.5
mycobacterium_phage_tallgrassmm_	N/A	<0.5
mycobacterium_phage_tapioca	N/A	<0.5
mycobacterium_phage_taptic	N/A	<0.5
mycobacterium_phage_target_complete_sequence,	N/A	<0.5
mycobacterium_phage_tarynearal	N/A	<0.5
mycobacterium_phage_tasp14	N/A	<0.5
mycobacterium_phage_teardrop	N/A	<0.5
mycobacterium_phage_terror	N/A	<0.5
mycobacterium_phage_tesla	N/A	<0.5
mycobacterium_phage_texage	N/A	<0.5
mycobacterium_phage_thanksgivukkah	N/A	<0.5
mycobacterium_phage_theia_complete_sequence,	N/A	<0.5
mycobacterium_phage_thespis	N/A	<0.5
mycobacterium_phage_thora_complete_sequence,	N/A	<0.5
mycobacterium_phage_threeoh3d2	N/A	<0.5
mycobacterium_phage_thyatira	N/A	<0.5
mycobacterium_phage_tiffany	N/A	<0.5
mycobacterium_phage_tiger_complete_sequence,	N/A	<0.5
mycobacterium_phage_timmi	N/A	<0.5
mycobacterium_phage_timshel_complete_sequence,	N/A	<0.5
mycobacterium_phage_tinybot	N/A	<0.5
mycobacterium_phage_tinytim_complete_sequence,	N/A	<0.5
mycobacterium_phage_tirotheta9_complete_sequence,	N/A	<0.5
mycobacterium_phage_tm4	N/A	<0.5
mycobacterium_phage_todacoro	N/A	<0.5
mycobacterium_phage_tomathan	N/A	<0.5
mycobacterium_phage_tombombadil	N/A	<0.5
mycobacterium_phage_tonenili	N/A	<0.5
mycobacterium_phage_tonetone	N/A	<0.5
mycobacterium_phage_tortellini	N/A	<0.5
mycobacterium_phage_tortoise16	N/A	<0.5
mycobacterium_phage_tres	N/A	<0.5
mycobacterium_phage_treykay	N/A	<0.5
mycobacterium_phage_trike	N/A	<0.5
mycobacterium_phage_tripl3t	N/A	<0.5
mycobacterium_phage_troll4	N/A	<0.5
mycobacterium_phage_trypo	N/A	<0.5
mycobacterium_phage_turbido_complete_sequence,	N/A	<0.5
mycobacterium_phage_turj99	N/A	<0.5
mycobacterium_phage_twister_complete_sequence,	N/A	<0.5
mycobacterium_phage_tygerblood_complete_sequence,	N/A	<0.5
mycobacterium_phage_tyke_complete_sequence,	N/A	<0.5
mycobacterium_phage_typha	N/A	<0.5
mycobacterium_phage_tyrionl	N/A	<0.5
mycobacterium_phage_u2	N/A	<0.5
mycobacterium_phage_uach1	N/A	<0.5
mycobacterium_phage_unclehowie	N/A	<0.5
mycobacterium_phage_upie_complete_sequence,	N/A	<0.5
mycobacterium_phage_vaishali24	N/A	<0.5
mycobacterium_phage_validus	N/A	<0.5
mycobacterium_phage_valjean	N/A	<0.5
mycobacterium_phage_vasunzinga	N/A	<0.5
mycobacterium_phage_vaticameos	N/A	<0.5
mycobacterium_phage_veracruz	N/A	<0.5
mycobacterium_phage_veritas	N/A	<0.5
mycobacterium_phage_vincenzo	N/A	<0.5
mycobacterium_phage_violet_complete_sequence,	N/A	<0.5
mycobacterium_phage_virapocalypse	N/A	<0.5
mycobacterium_phage_visconti	N/A	<0.5
mycobacterium_phage_vista	N/A	<0.5
mycobacterium_phage_vivaldi	N/A	<0.5
mycobacterium_phage_vortex	N/A	<0.5
mycobacterium_phage_waldowhy	N/A	<0.5
mycobacterium_phage_wallhey_complete_sequence,	N/A	<0.5
mycobacterium_phage_wally_complete_sequence,	N/A	<0.5
mycobacterium_phage_waltermcmickey	N/A	<0.5
mycobacterium_phage_wanda	N/A	<0.5
mycobacterium_phage_wander	N/A	<0.5
mycobacterium_phage_waterdiva	N/A	<0.5
mycobacterium_phage_waterfoul	N/A	<0.5
mycobacterium_phage_webster2	N/A	<0.5
mycobacterium_phage_weiss13	N/A	<0.5
mycobacterium_phage_wiks	N/A	<0.5
mycobacterium_phage_wilbur	N/A	<0.5
mycobacterium_phage_wildcat_complete_sequence,	N/A	<0.5
mycobacterium_phage_wile_complete_sequence,	N/A	<0.5
mycobacterium_phage_wilkins	N/A	<0.5
mycobacterium_phage_willis	N/A	<0.5
mycobacterium_phage_wintermute	N/A	<0.5
mycobacterium_phage_wizard007	N/A	<0.5
mycobacterium_phage_wunderphul	N/A	<0.5
mycobacterium_phage_wyatt2	N/A	<0.5
mycobacterium_phage_xavier	N/A	<0.5
mycobacterium_phage_xena	N/A	<0.5
mycobacterium_phage_xerxes_complete_sequence,	N/A	<0.5
mycobacterium_phage_ximenita	N/A	<0.5
mycobacterium_phage_yahalom_complete_sequence,	N/A	<0.5
mycobacterium_phage_yoshand	N/A	<0.5
mycobacterium_phage_yougoglencoco	N/A	<0.5
mycobacterium_phage_youreadopted	N/A	<0.5
mycobacterium_phage_yucca	N/A	<0.5
mycobacterium_phage_zaider	N/A	<0.5
mycobacterium_phage_zaka	N/A	<0.5
mycobacterium_phage_zakai	N/A	<0.5
mycobacterium_phage_zaria	N/A	<0.5
mycobacterium_phage_zavala	N/A	<0.5
mycobacterium_phage_zeeculate	N/A	<0.5
mycobacterium_phage_zeenon	N/A	<0.5
mycobacterium_phage_zelda	N/A	<0.5
mycobacterium_phage_zemanar	N/A	<0.5
mycobacterium_phage_zenon	N/A	<0.5
mycobacterium_phage_zentime222	N/A	<0.5
mycobacterium_phage_zeuska	N/A	<0.5
mycobacterium_phage_zoej	N/A	<0.5
mycobacterium_phage_zombie	N/A	<0.5
mycobacterium_phage_zonia	N/A	<0.5
mycobacterium_phage_zulu	N/A	<0.5
mycobacterium_phage_zygotaiga	N/A	<0.5
nc_000867.1	N/A	<0.5
nc_000929.1	N/A	<0.5
nc_000935.1	N/A	<0.5
nc_001270.2	N/A	<0.5
nc_001330.1	N/A	<0.5
nc_001331.1	N/A	<0.5
nc_001332.1	N/A	<0.5
nc_001341.1	N/A	<0.5
nc_001365.1	N/A	<0.5
nc_001396.1	N/A	<0.5
nc_001417.2	N/A	<0.5
nc_001422.1	N/A	<0.5
nc_001426.1	N/A	<0.5
nc_001447.1	N/A	<0.5
nc_001628.1	N/A	<0.5
nc_001730.1	N/A	<0.5
nc_001741.1	N/A	<0.5
nc_001825.1	N/A	<0.5
nc_001890.1	N/A	<0.5
nc_001954.1	N/A	<0.5
nc_001998.1	N/A	<0.5
nc_002194.1	N/A	<0.5
nc_002362.1	N/A	<0.5
nc_002363.1	N/A	<0.5
nc_002515.1	N/A	<0.5
nc_002643.1	N/A	<0.5
nc_002700.2	N/A	<0.5
nc_003216.1	N/A	<0.5
nc_003287.2	N/A	<0.5
nc_003300.1	N/A	<0.5
nc_003301.1	N/A	<0.5
nc_003327.2	N/A	<0.5
nc_003387.1	N/A	<0.5
nc_003390.2	N/A	<0.5
nc_003438.1	N/A	<0.5
nc_003460.1	N/A	<0.5
nc_003715.1	N/A	<0.5
nc_003716.1	N/A	<0.5
nc_003793.1	N/A	<0.5
nc_004066.1	N/A	<0.5
nc_004165.1	N/A	<0.5
nc_004166.2	N/A	<0.5
nc_004170.1	N/A	<0.5
nc_004171.1	N/A	<0.5
nc_004172.1	N/A	<0.5
nc_004173.1	N/A	<0.5
nc_004301.1	N/A	<0.5
nc_004306.1	N/A	<0.5
nc_004466.2	N/A	<0.5
nc_004664.2	N/A	<0.5
nc_004682.1	N/A	<0.5
nc_004687.1	N/A	<0.5
nc_004689.1	N/A	<0.5
nc_004735.1	N/A	<0.5
nc_004736.1	N/A	<0.5
nc_004775.1	N/A	<0.5
nc_004814.1	N/A	<0.5
nc_005069.1	N/A	<0.5
nc_005091.2	N/A	<0.5
nc_005131.2	N/A	<0.5
nc_005262.3	N/A	<0.5
nc_005355.1	N/A	<0.5
nc_005882.1	N/A	<0.5
nc_005884.1	N/A	<0.5
nc_005885.1	N/A	<0.5
nc_005948.1	N/A	<0.5
nc_006356.2	N/A	<0.5
nc_006938.1	N/A	<0.5
nc_006940.2	N/A	<0.5
nc_006953.1	N/A	<0.5
nc_007019.1	N/A	<0.5
nc_007024.1	N/A	<0.5
nc_007189.1	N/A	<0.5
nc_007291.1	N/A	<0.5
nc_007461.1	N/A	<0.5
nc_007497.1	N/A	<0.5
nc_007501.1	N/A	<0.5
nc_007603.1	N/A	<0.5
nc_007623.1	N/A	<0.5
nc_007637.1	N/A	<0.5
nc_007710.1	N/A	<0.5
nc_007804.2	N/A	<0.5
nc_007805.1	N/A	<0.5
nc_007806.1	N/A	<0.5
nc_007807.1	N/A	<0.5
nc_007808.1	N/A	<0.5
nc_007809.1	N/A	<0.5
nc_007810.1	N/A	<0.5
nc_007817.1	N/A	<0.5
nc_007821.1	N/A	<0.5
nc_007856.1	N/A	<0.5
nc_007902.1	N/A	<0.5
nc_007967.1	N/A	<0.5
nc_008152.1	N/A	<0.5
nc_008195.1	N/A	<0.5
nc_008197.1	N/A	<0.5
nc_008198.1	N/A	<0.5
nc_008199.1	N/A	<0.5
nc_008200.1	N/A	<0.5
nc_008202.2	N/A	<0.5
nc_008203.1	N/A	<0.5
nc_008205.1	N/A	<0.5
nc_008206.2	N/A	<0.5
nc_008207.1	N/A	<0.5
nc_008294.1	N/A	<0.5
nc_008355.1	N/A	<0.5
nc_008363.1	N/A	<0.5
nc_008364.1	N/A	<0.5
nc_008367.1	N/A	<0.5
nc_008370.1	N/A	<0.5
nc_008562.1	N/A	<0.5
nc_008574.2	N/A	<0.5
nc_008584.1	N/A	<0.5
nc_009014.1	N/A	<0.5
nc_009015.1	N/A	<0.5
nc_009016.1	N/A	<0.5
nc_009232.2	N/A	<0.5
nc_009236.1	N/A	<0.5
nc_009447.1	N/A	<0.5
nc_009514.1	N/A	<0.5
nc_009531.1	N/A	<0.5
nc_009540.1	N/A	<0.5
nc_009541.1	N/A	<0.5
nc_009542.2	N/A	<0.5
nc_009551.1	N/A	<0.5
nc_009554.1	N/A	<0.5
nc_009643.1	N/A	<0.5
nc_009760.1	N/A	<0.5
nc_009799.3	N/A	<0.5
nc_009803.1	N/A	<0.5
nc_009804.1	N/A	<0.5
nc_009814.1	N/A	<0.5
nc_009817.1	N/A	<0.5
nc_009878.1	N/A	<0.5
nc_009904.1	N/A	<0.5
nc_009936.1	N/A	<0.5
nc_009987.1	N/A	<0.5
nc_009990.1	N/A	<0.5
nc_009993.2	N/A	<0.5
nc_010106.1	N/A	<0.5
nc_010116.1	N/A	<0.5
nc_010324.1	N/A	<0.5
nc_010342.1	N/A	<0.5
nc_010353.1	N/A	<0.5
nc_010355.1	N/A	<0.5
nc_010363.1	N/A	<0.5
nc_010495.1	N/A	<0.5
nc_010576.1	N/A	<0.5
nc_010583.1	N/A	<0.5
nc_010811.2	N/A	<0.5
nc_010821.1	N/A	<0.5
nc_011019.1	N/A	<0.5
nc_011021.1	N/A	<0.5
nc_011022.1	N/A	<0.5
nc_011039.1	N/A	<0.5
nc_011041.1	N/A	<0.5
nc_011044.1	N/A	<0.5
nc_011046.1	N/A	<0.5
nc_011048.1	N/A	<0.5
nc_011057.1	N/A	<0.5
nc_011142.1	N/A	<0.5
nc_011165.1	N/A	<0.5
nc_011166.1	N/A	<0.5
nc_011167.1	N/A	<0.5
nc_011216.1	N/A	<0.5
nc_011222.1	N/A	<0.5
nc_011269.1	N/A	<0.5
nc_011270.1	N/A	<0.5
nc_011271.1	N/A	<0.5
nc_011272.1	N/A	<0.5
nc_011285.1	N/A	<0.5
nc_011290.1	N/A	<0.5
nc_011291.1	N/A	<0.5
nc_011292.1	N/A	<0.5
nc_011308.1	N/A	<0.5
nc_011318.1	N/A	<0.5
nc_011398.1	N/A	<0.5
nc_011399.1	N/A	<0.5
nc_011421.1	N/A	<0.5
nc_011523.1	N/A	<0.5
nc_011645.1	N/A	<0.5
nc_011703.1	N/A	<0.5
nc_011756.1	N/A	<0.5
nc_011810.1	N/A	<0.5
nc_011811.1	N/A	<0.5
nc_012027.1	N/A	<0.5
nc_012091.2	N/A	<0.5
nc_012092.1	N/A	<0.5
nc_012093.1	N/A	<0.5
nc_012223.2	N/A	<0.5
nc_012419.1	N/A	<0.5
nc_012530.1	N/A	<0.5
nc_012558.1	N/A	<0.5
nc_012662.1	N/A	<0.5
nc_012663.1	N/A	<0.5
nc_012743.2	N/A	<0.5
nc_012749.1	N/A	<0.5
nc_012757.1	N/A	<0.5
nc_012788.1	N/A	<0.5
nc_012868.1	N/A	<0.5
nc_012884.1	N/A	<0.5
nc_013021.1	N/A	<0.5
nc_013152.1	N/A	<0.5
nc_013594.1	N/A	<0.5
nc_013598.1	N/A	<0.5
nc_013599.1	N/A	<0.5
nc_013600.1	N/A	<0.5
nc_013638.1	N/A	<0.5
nc_013643.1	N/A	<0.5
nc_013644.1	N/A	<0.5
nc_013646.1	N/A	<0.5
nc_013649.2	N/A	<0.5
nc_013650.1	N/A	<0.5
nc_013691.1	N/A	<0.5
nc_013692.1	N/A	<0.5
[truncated: 2,425 more rows]
